# Supplementary material for: Risk Factors for Postural Tachycardia Syndrome in Children and Adolescents
Source: PubMed Central journal article supplement (PMC4256207; doi:10.1371/journal.pone.0113625), 2014-12-04
Supplement: pone.0113625.s001.pdf [file pone.0113625.s001.pdf]

# Test group

| code | sex | age | height | weight | BMI   | supine HR | supine SBP | supine DBP | HR1 | HR2 | HR3 | SBP3 | DBP3 | HR4 | HR5 | HR6 | SBP6 | DBP6 | HR7 | HR8 | HR9 | SBP9 | DBP9 | HR10 | highest HR | car sick | family history | water intake | sleeping hours | school-induced burden | HR increase | supine HR10 | POTS  |   |
|------|-----|-----|--------|--------|-------|-----------|------------|------------|-----|-----|-----|------|------|-----|-----|-----|------|------|-----|-----|-----|------|------|------|------------|----------|----------------|--------------|----------------|-----------------------|-------------|-------------|-------|---|
| 4    | 2   | 16  | 166    | 55     | 19.96 | 74        | 115        | 79         | 95  | 95  | 100 | 117  | 87   | 95  | 100 | 101 | 116  | 82   | 102 | 102 | 98  | 116  | 81   | 100  | 102        | 1        | 0              | 0            | 0              | 0                     | 0           | 28          | 7.40  | 0 |
| 5    | 2   | 16  | 162    | 50     | 19.05 | 72        | 111        | 73         | 91  | 87  | 93  | 113  | 78   | 94  | 90  | 93  | 112  | 76   | 96  | 90  | 86  | 115  | 78   | 83   | 96         | 1        | 0              | 0            | 0              | 0                     | 1           | 24          | 7.20  | 0 |
| 6    | 2   | 16  | 158    | 52     | 20.83 | 73        | 94         | 59         | 88  | 81  | 96  | 107  | 74   | 80  | 89  | 90  | 94   | 64   | 85  | 87  | 87  | 102  | 65   | 93   | 96         | 1        | 0              | 1            | 0              | 0                     | 0           | 23          | 7.30  | 0 |
| 9    | 2   | 17  | 162    | 62     | 23.62 | 72        | 117        | 78         | 71  | 78  | 80  | 120  | 78   | 75  | 77  | 72  | 148  | 80   | 74  | 83  | 79  | 115  | 77   | 82   | 83         | 1        | 0              | 0            | 1              | 1                     | 11          | 7.20        | 0     |   |
| 18   | 2   | 16  | 155    | 60     | 24.97 | 90        | 114        | 74         | 85  | 87  | 86  | 110  | 73   | 86  | 86  | 88  | 107  | 71   | 87  | 92  | 88  | 107  | 70   | 88   | 92         | 1        | 0              | 0            | 0              | 1                     | 2           | 9.00        | 0     |   |
| 21   | 2   | 17  | 162    | 57     | 21.72 | 85        | 118        | 70         | 117 | 110 | 105 | 135  | 79   | 105 | 116 | 110 | 117  | 84   | 105 | 105 | 105 | 131  | 78   | 111  | 117        | 0        | 0              | 1            | 0              | 0                     | 32          | 8.50        | 0     |   |
| 23   | 2   | 12  | 164    | 60     | 22.31 | 70        | 115        | 72         | 76  | 74  | 80  | 116  | 76   | 74  | 72  | 80  | 113  | 78   | 77  | 74  | 75  | 114  | 76   | 80   | 80         | 0        | 1              | 1            | 1              | 1                     | 10          | 7.00        | 0     |   |
| 26   | 1   | 12  | 155    | 45     | 18.73 | 91        | 127        | 78         | 112 | 108 | 105 | 144  | 99   | 105 | 104 | 102 | 141  | 103  | 105 | 104 | 109 | 139  | 101  | 109  | 112        | 1        | 1              | 0            | 0              | 0                     | 1           | 21          | 9.10  | 0 |
| 27   | 2   | 17  | 159    | 56     | 22.15 | 85        | 121        | 61         | 78  | 94  | 93  | 106  | 64   | 84  | 96  | 93  | 95   | 113  | 63  | 96  | 95  | 97   | 113  | 64   | 96         | 97       | 1              | 0            | 0              | 0                     | 0           | 12          | 8.50  | 0 |
| 30   | 2   | 18  | 162    | 47     | 17.91 | 68        | 118        | 71         | 91  | 91  | 90  | 122  | 80   | 85  | 84  | 91  | 118  | 75   | 87  | 95  | 86  | 110  | 74   | 95   | 95         | 0        | 0              | 0            | 0              | 0                     | 0           | 27          | 6.80  | 0 |
| 31   | 2   | 16  | 159    | 47     | 18.59 | 72        | 103        | 61         | 95  | 93  | 88  | 111  | 73   | 85  | 94  | 87  | 104  | 69   | 93  | 92  | 96  | 110  | 62   | 94   | 96         | 1        | 0              | 1            | 0              | 0                     | 1           | 24          | 7.20  | 0 |
| 32A  | 2   | 16  | 165    | 53     | 19.47 | 82        | 119        | 72         | 89  | 92  | 86  | 116  | 69   | 85  | 91  | 91  | 106  | 68   | 87  | 92  | 86  | 111  | 69   | 89   | 92         | 0        | 0              | 0            | 1              | 1                     | 10          | 8.20        | 0     |   |
| 36A  | 2   | 12  | 154    | 44     | 18.55 | 96        | 99         | 66         | 115 | 116 | 115 | 115  | 83   | 113 | 121 | 118 | 110  | 80   | 123 | 121 | 123 | 108  | 80   | 124  | 124        | 1        | 0              | 1            | 0              | 1                     | 28          | 9.60        | 1     |   |
| 37   | 2   | 16  | 160    | 58     | 22.66 | 76        | 121        | 73         | 86  | 85  | 90  | 124  | 89   | 97  | 100 | 93  | 121  | 80   | 93  | 92  | 98  | 123  | 80   | 93   | 100        | 1        | 0              | 0            | 0              | 0                     | 1           | 24          | 7.60  | 0 |
| 38   | 2   | 17  | 155    | 45     | 18.73 | 85        | 127        | 74         | 93  | 98  | 100 | 139  | 96   | 100 | 100 | 104 | 123  | 85   | 98  | 103 | 103 | 135  | 91   | 94   | 104        | 0        | 0              | 0            | 1              | 1                     | 19          | 8.50        | 0     |   |
| 39   | 1   | 12  | 161    | 64     | 24.69 | 94        | 126        | 84         | 105 | 112 | 111 | 131  | 95   | 107 | 110 | 109 | 134  | 97   | 111 | 112 | 118 | 131  | 95   | 110  | 118        | 0        | 0              | 1            | 0              | 0                     | 0           | 24          | 9.40  | 0 |
| 40A  | 2   | 16  | 160    | 48     | 18.75 | 106       | 110        | 69         | 106 | 113 | 112 | 122  | 79   | 109 | 113 | 111 | 113  | 76   | 109 | 110 | 108 | 118  | 76   | 106  | 113        | 0        | 1              | 0            | 0              | 0                     | 0           | 7           | 10.60 | 0 |
| 41A  | 2   | 16  | 153    | 50     | 21.36 | 68        | 131        | 85         | 75  | 74  | 76  | 140  | 82   | 74  | 75  | 75  | 130  | 75   | 77  | 75  | 71  | 137  | 47   | 75   | 77         | 1        | 0              | 1            | 0              | 1                     | 9           | 6.80        | 0     |   |
| 42   | 2   | 14  | 160    | 44     | 17.19 | 62        | 111        | 58         | 68  | 55  | 54  | 115  | 71   | 55  | 59  | 56  | 108  | 68   | 58  | 59  | 63  | 112  | 71   | 61   | 68         | 1        | 0              | 1            | 0              | 1                     | 6           | 6.20        | 0     |   |
| 43   | 2   | 12  | 160    | 42     | 16.41 | 98        | 112        | 68         | 119 | 118 | 124 | 125  | 74   | 125 | 122 | 128 | 122  | 80   | 129 | 129 | 125 | 137  | 83   | 124  | 129        | 1        | 0              | 0            | 1              | 1                     | 31          | 9.80        | 1     |   |
| 48A  | 2   | 17  | 155    | 58     | 24.14 | 74        | 113        | 63         | 101 | 100 | 104 | 116  | 74   | 101 | 101 | 107 | 112  | 74   | 102 | 115 | 116 | 115  | 78   | 111  | 116        | 1        | 0              | 1            | 1              | 1                     | 0           | 42          | 7.40  | 1 |
| 49   | 2   | 16  | 163    | 47     | 17.69 | 79        | 104        | 57         | 99  | 97  | 91  | 117  | 68   | 95  | 88  | 98  | 105  | 73   | 98  | 97  | 98  | 102  | 67   | 94   | 99         | 1        | 1              | 1            | 0              | 0                     | 20          | 7.90        | 0     |   |
| 50   | 2   | 16  | 166    | 62     | 22.50 | 89        | 103        | 70         | 96  | 105 | 100 | 107  | 74   | 106 | 103 | 106 | 108  | 70   | 104 | 98  | 103 | 109  | 64   | 105  | 106        | 1        | 0              | 0            | 1              | 0                     | 17          | 8.90        | 0     |   |
| 51A  | 2   | 16  | 164    | 90     | 33.46 | 86        | 111        | 73         | 105 | 112 | 104 | 104  | 76   | 109 | 107 | 110 | 109  | 76   | 109 | 113 | 111 | 113  | 76   | 108  | 113        | 1        | 0              | 0            | 1              | 0                     | 27          | 8.60        | 0     |   |
| 53   | 1   | 12  | 135    | 30     | 16.46 | 87        | 115        | 77         | 113 | 103 | 103 | 127  | 75   | 105 | 104 | 107 | 130  | 85   | 104 | 101 | 97  | 112  | 70   | 104  | 113        | 1        | 0              | 0            | 0              | 0                     | 1           | 26          | 8.70  | 0 |
| 54A  | 2   | 12  | 152    | 39     | 16.88 | 92        | 122        | 78         | 99  | 100 | 99  | 125  | 91   | 95  | 97  | 102 | 124  | 89   | 98  | 104 | 92  | 128  | 85   | 98   | 104        | 0        | 1              | 0            | 0              | 0                     | 0           | 12          | 9.20  | 0 |
| 55   | 2   | 17  | 163    | 49     | 18.44 | 65        | 106        | 66         | 84  | 89  | 93  | 109  | 79   | 91  | 93  | 96  | 103  | 75   | 96  | 104 | 100 | 117  | 76   | 96   | 104        | 1        | 0              | 1            | 0              | 1                     | 39          | 6.50        | 0     |   |
| 59   | 2   | 16  | 164    | 44     | 16.36 | 89        | 102        | 60         | 124 | 108 | 118 | 107  | 69   | 121 | 117 | 115 | 100  | 65   | 124 | 121 | 122 | 99   | 64   | 122  | 124        | 1        | 0              | 1            | 1              | 1                     | 35          | 8.90        | 1     |   |
| 60A  | 2   | 15  | 165    | 59     | 21.67 | 61        | 114        | 72         | 69  | 74  | 69  | 129  | 84   | 72  | 77  | 68  | 121  | 78   | 78  | 73  | 75  | 121  | 83   | 75   | 78         | 1        | 0              | 0            | 1              | 1                     | 17          | 6.10        | 0     |   |
| 62   | 2   | 17  | 152    | 45     | 19.48 | 84        | 105        | 60         | 89  | 84  | 93  | 98   | 62   | 85  | 92  | 93  | 101  | 62   | 93  | 95  | 99  | 104  | 56   | 90   | 99         | 0        | 0              | 1            | 0              | 0                     | 15          | 8.40        | 0     |   |
| 63   | 2   | 16  | 157    | 60     | 24.34 | 89        | 118        | 81         | 85  | 94  | 93  | 120  | 86   | 97  | 90  | 92  | 109  | 76   | 95  | 95  | 94  | 107  | 75   | 95   | 95         | 1        | 0              | 0            | 1              | 1                     | 6           | 8.90        | 0     |   |
| 64   | 2   | 16  | 164    | 49     | 18.22 | 58        | 118        | 67         | 73  | 82  | 74  | 114  | 70   | 75  | 77  | 73  | 116  | 73   | 77  | 76  | 79  | 116  | 73   | 81   | 82         | 0        | 0              | 1            | 1              | 1                     | 24          | 5.80        | 0     |   |
| 65   | 2   | 16  | 158    | 48     | 19.23 | 66        | 105        | 62         | 82  | 83  | 80  | 112  | 72   | 81  | 84  | 84  | 108  | 73   | 81  | 82  | 86  | 115  | 78   | 82   | 86         | 1        | 1              | 1            | 0              | 0                     | 20          | 6.60        | 0     |   |
| 69   | 2   | 16  | 161    | 55     | 21.22 | 75        | 103        | 64         | 87  | 79  | 89  | 116  | 76   | 82  | 81  | 83  | 114  | 77   | 84  | 86  | 82  | 109  | 76   | 83   | 89         | 1        | 0              | 1            | 0              | 1                     | 14          | 7.50        | 0     |   |
| 72   | 2   | 18  | 168    | 53     | 18.78 | 62        | 101        | 63         | 77  | 83  | 87  | 103  | 66   | 88  | 95  | 93  | 98   | 63   | 93  | 97  | 92  | 106  | 62   | 91   | 97         | 0        | 0              | 1            | 1              | 1                     | 35          | 6.20        | 0     |   |
| 76   | 2   | 18  | 160    | 41     | 16.02 | 72        | 94         | 61         | 105 | 106 | 113 | 104  | 68   | 109 | 119 | 113 | 97   | 65   | 114 | 113 | 106 | 101  | 71   | 107  | 119        | 1        | 0              | 1            | 1              | 1                     | 47          | 7.20        | 1     |   |
| 77   | 2   | 16  | 150    | 50     | 22.22 | 67        | 117        | 72         | 68  | 72  | 72  | 122  | 73   | 77  | 77  | 84  | 119  | 76   | 73  | 74  | 79  | 129  | 86   | 78   | 84         | 0        | 0              | 0            | 0              | 0                     | 0           | 17          | 6.70  | 0 |
| 78   | 2   | 15  | 155    | 44     | 18.31 | 77        | 112        | 75         | 75  | 85  | 88  | 124  | 86   | 90  | 96  | 93  | 120  | 81   | 88  | 93  | 95  | 116  | 83   | 87   | 96         | 1        | 0              | 1            | 0              | 0                     | 19          | 7.70        | 0     |   |
| 79   | 2   | 18  | 162    | 47     | 17.91 | 78        | 110        | 65         | 84  | 85  | 83  | 127  | 78   | 85  | 83  | 87  | 115  | 70   | 87  | 93  | 88  | 111  | 77   | 86   | 93         | 1        | 1              | 1            | 0              | 0                     | 15          | 7.80        | 0     |   |
| 80   | 2   | 16  | 159    | 56     | 22.15 | 64        | 101        | 57         | 83  | 78  | 75  | 116  | 79   | 76  | 91  | 82  | 105  | 71   | 86  | 92  | 90  | 117  | 75   | 88   | 92         | 0        | 0              | 0            | 0              | 1                     | 28          | 6.40        | 0     |   |
| 81   | 2   | 18  | 164    | 75     | 27.89 | 80        | 111        | 69         | 88  | 93  | 94  | 114  | 76   | 89  | 88  | 88  | 108  | 67   | 85  | 87  | 87  | 111  | 64   | 87   | 94         | 1        | 0              | 0            | 0              | 0                     | 14          | 8.00        | 0     |   |
| 82   | 2   | 17  | 157    | 68     | 27.59 | 81        | 134        | 77         | 81  | 81  | 87  | 133  | 79   | 87  | 89  | 84  | 134  | 88   | 86  | 88  | 83  | 124  | 84   | 88   | 89         | 1        | 0              | 0            | 0              | 1                     | 8           | 8.10        | 0     |   |
| 83A  | 2   | 14  | 150    | 48     | 21.33 | 86        | 113        | 66         | 100 | 96  | 95  | 123  | 78   | 96  | 97  | 94  | 114  | 77   | 103 | 102 | 93  | 115  | 73   | 91   | 103        | 0        | 1              | 0            | 0              | 0                     | 0           | 17          | 8.60  | 0 |
| 85A  | 2   | 16  | 162    | 54     | 20.58 | 75        | 113        | 64         | 87  | 84  | 81  | 111  | 67   | 86  | 94  | 96  | 109  | 65   | 86  | 84  | 87  | 103  | 62   | 91   | 96         | 0        | 0              | 0            | 0              | 0                     | 21          | 7.50        | 0     |   |
| 86   | 2   | 16  | 161    | 63     | 24.30 | 82        | 114        | 69         | 92  | 96  | 99  | 118  | 76   | 98  | 97  | 97  | 115  | 82   | 95  | 94  | 98  | 119  | 78   | 98   | 99         | 0        | 0              | 1            | 0              | 0                     | 17          | 8.20        | 0     |   |
| 87A  | 2   | 18  | 163    | 57     | 21.45 | 63        | 113        | 70         | 90  | 87  | 91  | 119  | 78   | 91  | 94  | 90  | 114  | 76   | 88  | 84  | 84  | 110  | 75   | 84   | 94         | 1        | 0              | 0            | 0              | 0                     | 31          | 6.30        | 0     |   |
| 88A  | 2   | 18  | 163    | 53     | 19.95 | 71        | 117        | 70         | 87  | 87  | 83  | 130  | 86   | 80  | 84  | 84  | 122  | 82   | 86  | 83  | 88  | 125  | 80   | 84   | 87         | 0        | 0              | 0            | 0              | 0                     | 16          | 7.10        | 0     |   |
| 89   | 2   | 16  | 162    | 54     | 20.58 | 50        | 121        | 73         | 62  | 58  | 65  | 126  | 79   | 73  | 72  | 64  | 123  | 78   | 72  | 76  | 65  | 124  | 81   | 70   | 76         | 1        | 0              | 0            | 0              | 0                     | 26          | 5.00        |       |   |

# Test group

| code | sex | age | height | weight | BMI   | supine HR | supine SBP | supine DBP | HR1 | HR2 | HR3 | SBP3 | DBP3 | HR4 | HR5 | HR6 | SBP6 | DBP6 | HR7 | HR8 | HR9 | SBP9 | DBP9 | HR10 | highest HR | car sick | family history | water intake | sleeping hours | school-induced burden | HR increase | supine HR10 | POTS |   |
|------|-----|-----|--------|--------|-------|-----------|------------|------------|-----|-----|-----|------|------|-----|-----|-----|------|------|-----|-----|-----|------|------|------|------------|----------|----------------|--------------|----------------|-----------------------|-------------|-------------|------|---|
| 97A  | 2   | 16  | 168    | 66     | 23.38 | 79        | 112        | 62         | 89  | 96  | 94  | 118  | 67   | 95  | 93  | 89  | 118  | 66   | 87  | 92  | 90  | 110  | 64   | 94   | 94         | 0        | 0              | 0            | 0              | 0                     | 0           | 15          | 7.90 | 0 |
| 98   | 2   | 18  | 162    | 56     | 21.34 | 92        | 118        | 78         | 110 | 104 | 103 | 131  | 78   | 107 | 108 | 104 | 117  | 79   | 98  | 97  | 91  | 118  | 80   | 100  | 110        | 0        | 0              | 0            | 0              | 0                     | 0           | 18          | 9.20 | 0 |
| 101A | 2   | 17  | 157    | 45     | 18.26 | 92        | 109        | 72         | 98  | 101 | 94  | 113  | 75   | 98  | 106 | 97  | 116  | 78   | 100 | 102 | 99  | 115  | 72   | 98   | 106        | 0        | 0              | 1            | 0              | 1                     | 14          | 9.20        | 0    |   |
| 104  | 2   | 18  | 157    | 44     | 17.85 | 82        | 103        | 62         | 103 | 119 | 108 | 107  | 67   | 104 | 96  | 98  | 100  | 66   | 100 | 102 | 104 | 103  | 66   | 92   | 119        | 0        | 0              | 1            | 0              | 0                     | 37          | 8.20        | 0    |   |
| 108A | 2   | 16  | 162    | 51     | 19.43 | 78        | 101        | 65         | 85  | 87  | 68  | 117  | 78   | 71  | 77  | 74  | 122  | 78   | 81  | 82  | 79  | 107  | 72   | 70   | 87         | 1        | 0              | 1            | 0              | 0                     | 9           | 7.80        | 0    |   |
| 110A | 2   | 17  | 159    | 48     | 18.99 | 90        | 116        | 66         | 92  | 98  | 108 | 121  | 64   | 102 | 102 | 108 | 121  | 60   | 95  | 98  | 102 | 119  | 55   | 100  | 108        | 1        | 0              | 1            | 0              | 0                     | 18          | 9.00        | 0    |   |
| 111  | 2   | 11  | 160    | 94     | 36.72 | 84        | 118        | 66         | 111 | 102 | 113 | 134  | 89   | 104 | 112 | 95  | 133  | 84   | 107 | 101 | 103 | 124  | 82   | 104  | 113        | 1        | 0              | 1            | 0              | 1                     | 29          | 8.40        | 0    |   |
| 112  | 2   | 12  | 153    | 44     | 18.80 | 87        | 115        | 76         | 98  | 99  | 95  | 126  | 79   | 99  | 101 | 103 | 114  | 73   | 106 | 105 | 109 | 120  | 75   | 106  | 109        | 0        | 1              | 0            | 0              | 0                     | 22          | 8.70        | 0    |   |
| 114A | 2   | 16  | 160    | 53     | 20.70 | 85        | 128        | 71         | 96  | 102 | 103 | 129  | 80   | 100 | 110 | 110 | 122  | 75   | 106 | 110 | 105 | 124  | 73   | 106  | 110        | 1        | 0              | 1            | 1              | 1                     | 0           | 25          | 8.50 | 0 |
| 116  | 2   | 17  | 159    | 60     | 23.73 | 65        | 121        | 71         | 105 | 111 | 100 | 123  | 72   | 109 | 110 | 112 | 128  | 83   | 114 | 110 | 101 | 127  | 82   | 96   | 114        | 0        | 0              | 1            | 1              | 0                     | 49          | 6.50        | 1    |   |
| 117A | 2   | 14  | 149    | 43     | 19.37 | 63        | 108        | 65         | 79  | 73  | 80  | 115  | 72   | 82  | 85  | 94  | 108  | 68   | 91  | 94  | 94  | 109  | 63   | 90   | 94         | 0        | 0              | 0            | 0              | 0                     | 31          | 6.30        | 0    |   |
| 119  | 2   | 17  | 157    | 56     | 22.72 | 79        | 104        | 69         | 79  | 72  | 74  | 104  | 71   | 76  | 85  | 75  | 100  | 66   | 83  | 87  | 79  | 99   | 64   | 77   | 87         | 0        | 0              | 0            | 0              | 0                     | 8           | 7.90        | 0    |   |
| 121  | 2   | 15  | 154    | 44     | 18.55 | 89        | 115        | 72         | 98  | 110 | 81  | 129  | 96   | 90  | 92  | 96  | 124  | 76   | 94  | 101 | 95  | 123  | 84   | 94   | 110        | 1        | 0              | 0            | 0              | 0                     | 21          | 8.90        | 0    |   |
| 124A | 2   | 18  | 163    | 54     | 20.32 | 80        | 120        | 74         | 86  | 87  | 91  | 131  | 76   | 83  | 84  | 95  | 132  | 85   | 90  | 92  | 90  | 129  | 81   | 92   | 95         | 1        | 0              | 1            | 0              | 0                     | 15          | 8.00        | 0    |   |
| 125  | 2   | 16  | 169    | 53     | 18.56 | 85        | 108        | 63         | 119 | 116 | 120 | 119  | 81   | 120 | 124 | 121 | 124  | 77   | 124 | 107 | 116 | 123  | 77   | 108  | 124        | 1        | 0              | 1            | 1              | 0                     | 39          | 8.50        | 0    |   |
| 127  | 2   | 12  | 149    | 42     | 18.92 | 75        | 115        | 52         | 94  | 101 | 96  | 121  | 65   | 107 | 105 | 110 | 108  | 67   | 112 | 107 | 105 | 106  | 67   | 107  | 112        | 1        | 0              | 1            | 0              | 0                     | 37          | 7.50        | 0    |   |
| 128A | 2   | 17  | 154    | 41     | 17.29 | 74        | 108        | 69         | 100 | 103 | 97  | 111  | 76   | 102 | 110 | 103 | 111  | 77   | 103 | 103 | 94  | 122  | 85   | 94   | 110        | 1        | 0              | 1            | 1              | 1                     | 36          | 7.40        | 0    |   |
| 129A | 2   | 16  | 162    | 54     | 20.58 | 91        | 112        | 71         | 108 | 103 | 113 | 110  | 81   | 108 | 114 | 110 | 111  | 83   | 118 | 116 | 118 | 126  | 89   | 114  | 118        | 1        | 0              | 1            | 1              | 0                     | 27          | 9.10        | 0    |   |
| 131  | 2   | 16  | 163    | 58     | 21.83 | 72        | 115        | 68         | 78  | 82  | 89  | 120  | 76   | 88  | 93  | 100 | 122  | 85   | 90  | 91  | 95  | 115  | 75   | 103  | 103        | 1        | 0              | 1            | 0              | 1                     | 31          | 7.20        | 0    |   |
| 132  | 2   | 17  | 162    | 49     | 18.67 | 87        | 116        | 75         | 76  | 81  | 85  | 120  | 74   | 93  | 88  | 99  | 117  | 81   | 95  | 90  | 84  | 125  | 82   | 86   | 99         | 0        | 0              | 1            | 1              | 0                     | 12          | 8.70        | 0    |   |
| 133  | 2   | 16  | 163    | 59     | 22.21 | 72        | 109        | 69         | 84  | 78  | 74  | 115  | 81   | 77  | 85  | 83  | 109  | 76   | 86  | 86  | 84  | 112  | 84   | 80   | 86         | 1        | 0              | 1            | 1              | 0                     | 14          | 7.20        | 0    |   |
| 134  | 2   | 16  | 151    | 41     | 17.98 | 63        | 108        | 75         | 73  | 73  | 87  | 113  | 82   | 81  | 91  | 81  | 116  | 87   | 78  | 90  | 82  | 112  | 84   | 88   | 91         | 1        | 0              | 0            | 0              | 0                     | 28          | 6.30        | 0    |   |
| 135  | 2   | 12  | 153    | 44     | 18.80 | 84        | 116        | 72         | 110 | 105 | 110 | 116  | 62   | 105 | 108 | 109 | 116  | 69   | 115 | 115 | 108 | 106  | 60   | 113  | 115        | 0        | 0              | 0            | 0              | 1                     | 31          | 8.40        | 0    |   |
| 139A | 2   | 17  | 162    | 54     | 20.58 | 65        | 103        | 60         | 89  | 79  | 88  | 109  | 68   | 78  | 86  | 80  | 114  | 74   | 81  | 84  | 76  | 108  | 69   | 78   | 89         | 1        | 1              | 1            | 1              | 1                     | 24          | 6.50        | 0    |   |
| 141  | 1   | 13  | 162    | 50     | 19.05 | 86        | 125        | 73         | 98  | 100 | 102 | 136  | 78   | 90  | 95  | 100 | 129  | 85   | 97  | 100 | 103 | 136  | 79   |      | 103        | 0        | 0              | 0            | 0              | 0                     | 17          | 8.60        | 0    |   |
| 143  | 2   | 15  | 163    | 61     | 22.96 | 81        | 117        | 77         | 80  | 76  | 76  | 120  | 80   | 80  | 92  | 79  | 116  | 77   | 91  | 85  | 80  | 118  | 73   | 81   | 92         | 1        | 0              | 1            | 0              | 1                     | 11          | 8.10        | 0    |   |
| 144  | 2   | 15  | 162    | 48     | 18.29 | 65        | 110        | 64         | 64  | 72  | 84  | 115  | 67   | 91  | 102 | 89  | 120  | 79   | 89  | 70  | 72  | 110  | 75   | 92   | 102        | 0        | 1              | 1            | 0              | 0                     | 37          | 6.50        | 0    |   |
| 145  | 1   | 13  | 162    | 53     | 20.20 | 98        | 121        | 76         | 120 | 116 | 122 | 148  | 85   | 125 | 125 | 123 | 131  | 87   | 130 | 136 | 138 | 127  | 84   | 134  | 138        | 0        | 1              | 0            | 0              | 0                     | 40          | 9.80        | 1    |   |
| 146  | 2   | 12  | 155    | 44     | 18.31 | 85        | 107        | 70         | 85  | 88  | 88  | 120  | 88   | 90  | 89  | 93  | 122  | 88   | 96  | 96  | 94  | 121  | 83   | 96   | 96         | 0        | 0              | 0            | 0              | 1                     | 11          | 8.50        | 0    |   |
| 148  | 1   | 12  | 158    | 70     | 28.04 | 100       | 124        | 65         | 117 | 107 | 108 | 125  | 59   | 108 | 110 | 102 | 121  | 65   | 111 | 111 | 111 | 128  | 63   | 111  | 117        | 1        | 0              | 1            | 0              | 0                     | 17          | 10.00       | 0    |   |
| 149  | 1   | 12  | 152    | 44     | 19.04 | 85        | 117        | 82         | 93  | 84  | 88  | 123  | 86   | 90  | 96  | 109 | 118  | 86   | 105 | 108 | 109 | 131  | 82   | 94   | 109        | 0        | 0              | 0            | 0              | 1                     | 24          | 8.50        | 0    |   |
| 151  | 2   | 16  | 165    | 59     | 21.67 | 66        | 112        | 64         | 75  | 86  | 81  | 109  | 78   | 87  | 91  | 82  | 114  | 75   | 84  | 85  | 88  | 114  | 80   | 85   | 91         | 0        | 0              | 0            | 0              | 0                     | 25          | 6.60        | 0    |   |
| 153  | 2   | 17  | 155    | 49     | 20.40 | 69        | 103        | 68         | 70  | 71  | 71  | 115  | 77   | 70  | 75  | 78  | 113  | 76   | 70  | 75  | 71  | 112  | 75   | 77   | 78         | 1        | 0              | 0            | 0              | 0                     | 9           | 6.90        | 0    |   |
| 154  | 2   | 16  | 158    | 49     | 19.63 | 70        | 100        | 65         | 84  | 79  | 84  | 113  | 82   | 86  | 84  | 84  | 109  | 77   | 79  | 82  | 85  | 106  | 70   | 83   | 86         | 1        | 0              | 0            | 0              | 0                     | 16          | 7.00        | 0    |   |
| 164  | 2   | 18  | 161    | 53     | 20.45 | 82        | 104        | 64         | 93  | 109 | 97  | 111  | 76   | 95  | 98  | 90  | 119  | 73   | 96  | 104 | 99  | 111  | 75   | 95   | 109        | 1        | 0              | 1            | 0              | 0                     | 27          | 8.20        | 0    |   |
| 165A | 2   | 17  | 155    | 55     | 22.89 | 75        | 104        | 64         | 75  | 88  | 91  | 112  | 72   | 87  | 85  | 82  | 104  | 67   | 88  | 87  | 84  | 112  | 71   | 78   | 91         | 1        | 0              | 1            | 0              | 1                     | 16          | 7.50        | 0    |   |
| 166  | 2   | 17  | 158    | 90     | 36.05 | 73        | 106        | 69         | 68  | 85  | 80  | 116  | 84   | 88  | 86  | 90  | 117  | 83   | 87  | 91  | 89  | 116  | 79   | 97   | 97         | 1        | 0              | 1            | 0              | 0                     | 24          | 7.30        | 0    |   |
| 168  | 2   | 16  | 166    | 51     | 18.51 | 72        | 96         | 63         | 75  | 81  | 83  | 104  | 72   | 89  | 86  | 89  | 107  | 70   | 88  | 89  | 90  | 106  | 73   | 88   | 90         | 0        | 1              | 1            | 0              | 0                     | 18          | 7.20        | 0    |   |
| 169  | 2   | 17  | 160    | 54     | 21.09 | 73        | 108        | 63         | 88  | 83  | 81  | 113  | 84   | 84  | 84  | 83  | 111  | 79   | 87  | 86  | 85  | 120  | 82   | 84   | 88         | 1        | 0              | 1            | 0              | 0                     | 15          | 7.30        | 0    |   |
| 170A | 2   | 16  | 161    | 56     | 21.60 | 82        | 114        | 71         | 120 | 100 | 97  | 122  | 77   | 101 | 96  | 92  | 116  | 75   | 95  | 91  | 99  | 120  | 72   | 92   | 120        | 1        | 0              | 1            | 0              | 1                     | 38          | 8.20        | 0    |   |
| 171  | 2   | 16  | 159    | 52     | 20.57 | 88        | 126        | 80         | 98  | 89  | 82  | 126  | 84   | 90  | 89  | 85  | 129  | 80   | 84  | 90  | 87  | 126  | 83   | 104  | 104        | 0        | 0              | 1            | 1              | 0                     | 16          | 8.80        | 0    |   |
| 172  | 2   | 17  | 163    | 52     | 19.57 | 77        | 97         | 67         | 96  | 99  | 96  | 111  | 83   | 96  | 99  | 98  | 115  | 85   | 98  | 98  | 97  | 107  | 80   | 96   | 99         | 0        | 1              | 1            | 0              | 1                     | 22          | 7.70        | 0    |   |
| 173A | 1   | 13  | 165    | 45     | 16.53 | 86        | 117        | 71         | 113 | 106 | 102 | 117  | 84   | 111 | 107 | 114 | 118  | 82   | 102 | 106 | 107 | 113  | 79   | 110  | 114        | 0        | 0              | 1            | 0              | 1                     | 28          | 8.60        | 0    |   |
| 175  | 2   | 18  | 153    | 41     | 17.51 | 82        | 107        | 71         | 90  | 92  | 94  | 115  | 78   | 93  | 96  | 94  | 115  | 80   | 86  | 97  | 89  | 115  | 80   | 93   | 97         | 0        | 0              | 0            | 0              | 0                     | 15          | 8.20        | 0    |   |
| 176A | 1   | 14  | 156    | 45     | 18.49 | 97        | 108        | 71         | 105 | 112 | 113 | 119  | 84   | 108 | 108 | 111 | 119  | 83   | 112 | 106 | 114 | 117  | 85   | 112  | 114        | 0        | 1              | 1            | 1              | 0                     | 17          | 9.70        | 0    |   |
| 178  | 2   | 16  | 153    | 61     | 26.06 | 82        | 98         | 59         | 93  | 83  | 89  | 112  | 75   | 88  | 91  | 90  | 114  | 73   | 97  | 93  | 89  | 112  | 71   | 87   | 97         | 1        | 0              | 1            | 0              | 0                     | 15          | 8.20        | 0    |   |
| 184A | 1   | 13  | 149    | 39     | 17.57 | 72        | 101        | 66         | 76  | 75  | 84  | 110  | 78   | 80  | 90  | 85  | 109  | 77   | 86  | 93  | 87  | 120  | 79   | 84   | 93         | 1        | 0              | 0            | 0              | 1                     | 21          | 7.20        | 0    |   |
| 185  | 1   | 17  | 178    | 65     | 20.52 | 75        | 117        | 67         | 87  | 90  | 89  | 130  | 77   | 92  | 93  | 97  | 127  | 72   | 99  | 98  | 96  | 135  | 72   | 96   | 99         | 0        | 0              | 0            | 0              |                       |             |             |      |   |

# Test group

| code | sex | age | height | weight | BMI   | supine HR | supine SBP | supine DBP | HR1 | HR2 | HR3 | SBP3 | DBP3 | HR4 | HR5 | HR6 | SBP6 | DBP6 | HR7 | HR8 | HR9 | SBP9 | DBP9 | HR10 | highest HR | car sick | family history | water intake | sleeping hours | school-induced burden | HR increase | supine HR10 | POTS |
|------|-----|-----|--------|--------|-------|-----------|------------|------------|-----|-----|-----|------|------|-----|-----|-----|------|------|-----|-----|-----|------|------|------|------------|----------|----------------|--------------|----------------|-----------------------|-------------|-------------|------|
| 199  | 1   | 14  | 161    | 44     | 16.97 | 86        | 110        | 49         | 105 | 99  | 103 | 116  | 73   | 102 | 98  | 104 | 117  | 60   | 110 | 111 | 110 | 116  | 66   | 118  | 118        | 1        | 1              | 1            | 0              | 1                     | 32          | 8.60        | 0    |
| 201  | 2   | 13  | 164    | 55     | 20.45 | 70        | 107        | 59         | 80  | 88  | 81  | 118  | 76   | 75  | 81  | 86  | 115  | 69   | 88  | 78  | 88  | 114  | 66   | 84   | 88         | 1        | 1              | 0            | 0              | 1                     | 18          | 7.00        | 0    |
| 202  | 2   | 14  | 151    | 51     | 22.37 | 97        | 117        | 71         | 105 | 107 | 115 | 129  | 93   | 118 | 123 | 120 | 126  | 93   | 122 | 112 | 120 | 134  | 89   | 119  | 123        | 1        | 1              | 1            | 0              | 1                     | 26          | 9.70        | 1    |
| 204  | 2   | 13  | 144    | 34     | 16.40 | 95        | 101        | 56         | 115 | 114 | 114 | 105  | 62   | 110 | 120 | 107 | 106  | 67   | 108 | 109 | 113 | 107  | 62   | 114  | 120        | 0        | 0              | 0            | 0              | 1                     | 25          | 9.50        | 1    |
| 205  | 2   | 13  | 163    | 54     | 20.32 | 98        | 101        | 59         | 111 | 111 | 112 | 120  | 78   | 109 | 112 | 110 | 114  | 74   | 108 | 118 | 115 | 111  | 78   | 108  | 118        | 1        | 1              | 0            | 0              | 1                     | 20          | 9.80        | 0    |
| 206  | 2   | 13  | 163    | 50     | 18.82 | 86        | 124        | 78         | 88  | 93  | 90  | 138  | 88   | 112 | 94  | 91  | 132  | 87   | 95  | 102 | 102 | 131  | 82   | 106  | 112        | 0        | 1              | 1            | 0              | 1                     | 26          | 8.60        | 0    |
| 207  | 1   | 15  | 171    | 62     | 21.20 | 84        | 111        | 55         | 106 | 111 | 98  | 120  | 77   | 101 | 108 | 108 | 119  | 75   | 101 | 107 | 108 | 119  | 75   | 104  | 111        | 1        | 0              | 0            | 0              | 0                     | 27          | 8.40        | 0    |
| 208  | 2   | 14  | 153    | 58     | 24.78 | 94        | 113        | 74         | 87  | 97  | 101 | 119  | 77   | 96  | 102 | 100 | 118  | 77   | 103 | 97  | 118 | 118  | 80   | 96   | 118        | 0        | 1              | 0            | 0              | 1                     | 24          | 9.40        | 0    |
| 209  | 1   | 13  | 173    | 55     | 18.38 | 93        | 116        | 73         | 112 | 103 | 111 | 124  | 86   | 100 | 100 | 99  | 119  | 85   | 117 | 114 | 113 | 121  | 79   | 109  | 117        | 1        | 0              | 1            | 0              | 1                     | 24          | 9.30        | 0    |
| 211  | 2   | 13  | 162    | 45     | 17.15 | 95        | 104        | 64         | 102 | 118 | 135 | 79   | 112  | 117 | 111 | 137 | 85   | 103  | 110 | 113 | 132 | 81   | 116  | 118  | 0          | 1        | 1              | 1            | 1              | 23                    | 9.50        | 0           |      |
| 212  | 1   | 15  | 175    | 66     | 21.55 | 80        | 119        | 65         | 113 | 104 | 103 | 125  | 81   | 108 | 103 | 113 | 127  | 81   | 108 | 116 | 100 | 127  | 83   | 106  | 116        | 0        | 0              | 0            | 0              | 0                     | 36          | 8.00        | 0    |
| 215  | 1   | 13  | 155    | 46     | 19.15 | 81        | 116        | 62         | 89  | 95  | 97  | 121  | 74   | 99  | 96  | 101 | 115  | 77   | 93  | 97  | 96  | 115  | 68   | 93   | 101        | 0        | 0              | 0            | 0              | 0                     | 20          | 8.10        | 0    |
| 217  | 1   | 13  | 176    | 51     | 16.46 | 72        | 125        | 71         | 100 | 103 | 109 | 139  | 94   | 100 | 103 | 108 | 129  | 86   | 104 | 104 | 106 | 129  | 83   | 113  | 113        | 1        | 0              | 1            | 0              | 1                     | 41          | 7.20        | 1    |
| 218  | 1   | 13  | 160    | 48     | 18.75 | 87        | 115        | 64         | 113 | 118 | 109 | 127  | 79   | 108 | 105 | 112 | 130  | 83   | 120 | 109 | 121 | 128  | 76   | 110  | 121        | 0        | 0              | 0            | 0              | 1                     | 34          | 8.70        | 1    |
| 220  | 2   | 13  | 155    | 53     | 22.06 | 99        | 127        | 84         | 118 | 110 | 108 | 141  | 98   | 109 | 108 | 114 | 140  | 74   | 108 | 112 | 110 | 139  | 85   | 109  | 118        | 0        | 1              | 1            | 0              | 0                     | 19          | 9.90        | 0    |
| 223  | 2   | 13  | 159    | 53     | 20.96 | 77        | 111        | 60         | 90  | 88  | 94  | 117  | 67   | 90  | 92  | 97  | 117  | 71   | 94  | 96  | 94  | 131  | 74   | 94   | 97         | 1        | 1              | 1            | 0              | 1                     | 20          | 7.70        | 0    |
| 224  | 1   | 13  | 156    | 43     | 17.67 | 112       | 110        | 66         | 122 | 121 | 113 | 114  | 79   | 115 | 117 | 111 | 116  | 75   | 111 | 116 | 112 | 114  | 65   | 110  | 122        | 0        | 0              | 0            | 0              | 1                     | 10          | 11.20       | 0    |
| 225  | 2   | 13  | 170    | 58     | 20.07 | 87        | 121        | 76         | 107 | 109 | 104 | 131  | 98   | 108 | 110 | 107 | 129  | 93   | 111 | 111 | 107 | 126  | 82   | 108  | 111        | 0        | 0              | 0            | 0              | 1                     | 24          | 8.70        | 0    |
| 228  | 2   | 14  | 154    | 47     | 19.82 | 85        | 118        | 81         | 90  | 92  | 97  | 134  | 95   | 102 | 98  | 103 | 132  | 79   | 105 | 109 | 106 | 132  | 92   | 100  | 109        | 1        | 1              | 1            | 0              | 1                     | 24          | 8.50        | 0    |
| 229  | 2   | 14  | 168    | 55     | 19.49 | 84        | 118        | 76         | 85  | 94  | 96  | 136  | 87   | 100 | 94  | 99  | 125  | 78   | 94  | 96  | 87  | 121  | 83   | 93   | 100        | 0        | 0              | 0            | 0              | 1                     | 16          | 8.40        | 0    |
| 231  | 2   | 15  | 157    | 55     | 22.31 | 84        | 125        | 84         | 80  | 89  | 90  | 137  | 96   | 90  | 94  | 93  | 141  | 91   | 97  | 93  | 95  | 146  | 98   | 99   | 99         | 0        | 0              | 0            | 0              | 1                     | 15          | 8.40        | 0    |
| 232  | 1   | 14  | 176    | 68     | 21.95 | 92        | 123        | 75         | 104 | 102 | 100 | 131  | 80   | 98  | 97  | 107 | 131  | 80   | 102 | 105 | 95  | 129  | 78   | 97   | 105        | 1        | 0              | 0            | 1              | 1                     | 13          | 9.20        | 0    |
| 236  | 1   | 14  | 167    | 62     | 22.23 | 93        | 113        | 74         | 112 | 123 | 102 | 122  | 89   | 100 | 104 | 104 | 122  | 83   | 103 | 116 | 102 | 129  | 75   | 99   | 123        | 1        | 0              | 0            | 0              | 1                     | 30          | 9.30        | 1    |
| 237  | 1   | 13  | 172    | 55     | 18.59 | 90        | 134        | 85         | 108 | 110 | 112 | 154  | 105  | 118 | 114 | 120 | 156  | 106  | 116 | 116 | 114 | 143  | 98   | 120  | 120        | 1        | 1              | 1            | 0              | 1                     | 30          | 9.00        | 0    |
| 240  | 2   | 13  | 155    | 45     | 18.73 | 88        | 105        | 76         | 106 | 107 | 108 | 116  | 77   | 114 | 116 | 107 | 112  | 77   | 107 | 112 | 114 | 115  | 76   | 122  | 122        | 0        | 0              | 0            | 0              | 0                     | 34          | 8.80        | 0    |
| 241  | 2   | 14  | 158    | 50     | 20.03 | 85        | 129        | 74         | 111 | 81  | 85  | 125  | 58   | 86  | 91  | 90  | 124  | 68   | 87  | 88  | 89  | 125  | 55   | 89   | 111        | 0        | 1              | 1            | 0              | 1                     | 26          | 8.50        | 0    |
| 242  | 1   | 13  | 168    | 59     | 20.90 | 75        | 112        | 58         | 112 | 105 | 107 | 133  | 76   | 106 | 103 | 107 | 125  | 70   | 116 | 116 | 112 | 118  | 70   | 111  | 116        | 1        | 1              | 1            | 1              | 0                     | 41          | 7.50        | 1    |
| 243  | 1   | 13  | 158    | 42     | 16.82 | 85        | 116        | 61         | 102 | 107 | 105 | 109  | 72   | 102 | 97  | 105 | 112  | 70   | 112 | 114 | 100 | 113  | 74   | 103  | 114        | 1        | 1              | 0            | 0              | 1                     | 29          | 8.50        | 0    |
| 244  | 2   | 12  | 154    | 50     | 21.08 | 86        | 111        | 76         | 101 | 97  | 100 | 119  | 81   | 111 | 100 | 99  | 122  | 79   | 100 | 104 | 108 | 114  | 77   | 98   | 111        | 1        | 0              | 1            | 0              | 1                     | 25          | 8.60        | 0    |
| 247  | 1   | 13  | 158    | 43     | 17.22 | 88        | 109        | 69         | 107 | 110 | 111 | 126  | 84   | 93  | 120 | 118 | 112  | 73   | 125 | 121 | 121 | 125  | 71   | 121  | 125        | 1        | 0              | 0            | 0              | 1                     | 37          | 8.80        | 0    |
| 248  | 1   | 13  | 174    | 52     | 17.18 | 90        | 124        | 79         | 104 | 109 | 103 | 127  | 75   | 108 | 110 | 111 | 121  | 74   | 116 | 118 | 110 | 130  | 77   | 114  | 118        | 1        | 0              | 1            | 0              | 0                     | 28          | 9.00        | 0    |
| 249  | 1   | 13  | 165    | 53     | 19.47 | 79        | 123        | 57         | 94  | 101 | 88  | 119  | 64   | 92  | 95  | 100 | 127  | 67   | 101 | 88  | 87  | 129  | 65   | 92   | 101        | 1        | 1              | 1            | 0              | 1                     | 22          | 7.90        | 0    |
| 250  | 2   | 13  | 150    | 50     | 22.22 | 70        | 99         | 62         | 87  | 74  | 76  | 106  | 70   | 82  | 83  | 82  | 101  | 72   | 87  | 85  | 81  | 106  | 71   | 89   | 89         | 0        | 0              | 1            | 0              | 1                     | 19          | 7.00        | 0    |
| 251  | 1   | 18  | 174    | 65     | 21.47 | 77        | 117        | 70         | 85  | 82  | 85  | 118  | 77   | 85  | 90  | 89  | 119  | 76   | 89  | 85  | 88  | 116  | 76   | 86   | 90         | 0        | 0              | 1            | 1              | 0                     | 13          | 7.70        | 0    |
| 252  | 2   | 13  | 160    | 40     | 15.63 | 122       | 126        | 81         | 133 | 127 | 133 | 139  | 98   | 133 | 131 | 133 | 133  | 94   | 133 | 133 | 135 | 147  | 98   | 134  | 135        | 1        | 0              | 1            | 0              | 1                     | 13          | 12.20       | 0    |
| 254  | 2   | 14  | 158    | 45     | 18.03 | 92        | 117        | 68         | 104 | 103 | 100 | 121  | 77   | 102 | 104 | 102 | 117  | 83   | 103 | 102 | 108 | 111  | 79   | 104  | 108        | 0        | 1              | 1            | 0              | 0                     | 16          | 9.20        | 0    |
| 255  | 1   | 18  | 166    | 55     | 19.96 | 80        | 119        | 64         | 77  | 81  | 79  | 122  | 87   | 84  | 84  | 83  | 126  | 83   | 88  | 79  | 79  | 126  | 78   | 78   | 88         | 0        | 0              | 1            | 0              | 0                     | 8           | 8.00        | 0    |
| 257  | 1   | 15  | 172    | 57     | 19.27 | 76        | 121        | 81         | 87  | 88  | 92  | 124  | 81   | 99  | 94  | 95  | 119  | 87   | 97  | 90  | 93  | 122  | 84   | 96   | 99         | 1        | 0              | 0            | 0              | 1                     | 23          | 7.60        | 0    |
| 259  | 1   | 14  | 168    | 64     | 22.68 | 76        | 116        | 43         | 96  | 90  | 100 | 119  | 64   | 95  | 103 | 105 | 126  | 76   | 99  | 97  | 105 | 124  | 67   | 96   | 105        | 1        | 1              | 0            | 0              | 1                     | 29          | 7.60        | 0    |
| 260  | 1   | 14  | 168    | 53     | 18.78 | 80        | 104        | 67         | 111 | 101 | 98  | 101  | 71   | 101 | 102 | 104 | 108  | 70   | 97  | 102 | 94  | 106  | 72   | 104  | 111        | 1        | 1              | 0            | 0              | 1                     | 31          | 8.00        | 0    |
| 262  | 1   | 15  | 172    | 70     | 23.66 | 84        | 105        | 62         | 98  | 102 | 99  | 117  | 79   | 96  | 98  | 97  | 118  | 77   | 96  | 98  | 92  | 120  | 75   | 97   | 102        | 1        | 0              | 0            | 0              | 1                     | 18          | 8.40        | 0    |
| 263  | 1   | 13  | 175    | 55     | 17.96 | 75        | 110        | 68         | 85  | 90  | 94  | 127  | 82   | 92  | 88  | 96  | 121  | 80   | 86  | 96  | 98  | 119  | 78   | 102  | 102        | 0        | 0              | 0            | 0              | 1                     | 27          | 7.50        | 0    |
| 264  | 2   | 15  | 162    | 50     | 19.05 | 75        | 102        | 66         | 81  | 82  | 85  | 111  | 78   | 89  | 88  | 84  | 108  | 73   | 85  | 87  | 85  | 107  | 68   | 87   | 89         | 1        | 1              | 1            | 0              | 1                     | 14          | 7.50        | 0    |
| 265  | 2   | 15  | 170    | 55     | 19.03 | 65        | 109        | 66         | 86  | 80  | 84  | 111  | 75   | 92  | 87  | 89  | 109  | 70   | 88  | 92  | 89  | 107  | 71   | 88   | 92         | 1        | 1              | 0            | 0              | 1                     | 27          | 6.50        | 0    |
| 266  | 2   | 13  | 160    | 45     | 17.58 | 92        | 110        | 67         | 102 | 113 | 106 | 114  | 76   | 113 | 116 | 109 | 125  | 75   | 119 | 125 | 119 | 116  | 71   | 121  | 125        | 1        | 1              | 1            | 1              | 1                     | 33          | 9.20        | 1    |
| 267  | 1   | 13  | 170    | 55     | 19.03 | 86        | 119        | 74         | 92  | 93  | 102 | 126  | 92   | 104 | 94  | 100 | 131  | 81   | 98  | 93  | 91  | 142  | 90   | 90   | 104        | 1        | 0              | 0            | 0              | 1                     | 18          | 8.60        | 0    |
| 268  | 2   | 13  | 157    | 40     | 16.23 | 105       | 110        | 62         | 115 | 114 | 120 | 114  | 75   | 114 | 115 | 118 | 114  | 73   | 116 | 120 | 120 | 119  | 72   | 113  | 120        | 1        | 1              | 1            | 0              | 1                     | 15          | 10.50       | 1    |
| 269  | 1   | 13  | 167    | 51     | 18.43 | 74        | 99         | 54         | 94  | 99  | 91  | 112  | 70   | 95  | 9   |     |      |      |     |     |     |      |      |      |            |          |                |              |                |                       |             |             |      |

# Test group

| code | sex | age | height | weight | BMI   | supine HR | supine SBP | supine DBP | HR1 | HR2 | HR3 | SBP3 | DBP3 | HR4 | HR5 | HR6 | SBP6 | DBP6 | HR7 | HR8 | HR9 | SBP9 | DBP9 | HR10 | highest HR | car sick | family history | water intake | sleeping hours | school-induced burden | HR increase | supine HR10 | POTS |
|------|-----|-----|--------|--------|-------|-----------|------------|------------|-----|-----|-----|------|------|-----|-----|-----|------|------|-----|-----|-----|------|------|------|------------|----------|----------------|--------------|----------------|-----------------------|-------------|-------------|------|
| 281  | 1   | 13  | 169    | 50     | 17.51 | 96        | 120        | 78         | 116 | 107 | 109 | 128  | 80   | 114 | 117 | 118 | 128  | 82   | 117 | 117 | 123 | 130  | 85   | 128  | 128        | 1        | 0              | 0            | 0              | 1                     | 32          | 9.60        | 0    |
| 285  | 2   | 13  | 156    | 43     | 17.67 | 87        | 105        | 66         | 100 | 97  | 98  | 116  | 82   | 95  | 97  | 94  | 114  | 79   | 94  | 95  | 102 | 112  | 79   | 96   | 102        | 0        | 0              | 1            | 1              | 1                     | 15          | 8.70        | 0    |
| 286  | 2   | 13  | 156    | 43     | 17.67 | 93        | 107        | 67         | 109 | 107 | 110 | 111  | 77   | 118 | 107 | 106 | 113  | 72   | 112 | 109 | 105 | 110  | 74   | 111  | 118        | 1        | 0              | 1            | 0              | 1                     | 25          | 9.30        | 0    |
| 287  | 2   | 13  | 168    | 65     | 23.03 | 83        | 121        | 61         | 106 | 104 | 101 | 128  | 81   | 106 | 102 | 108 | 115  | 81   | 110 | 103 | 103 | 126  | 81   | 105  | 110        | 0        | 1              | 0            | 0              | 1                     | 27          | 8.30        | 0    |
| 288  | 2   | 13  | 161    | 40     | 15.43 | 83        | 107        | 70         | 106 | 107 | 105 | 115  | 83   | 111 | 100 | 112 | 124  | 79   | 107 | 109 | 101 | 118  | 79   | 101  | 111        | 1        | 1              | 1            | 0              | 1                     | 28          | 8.30        | 0    |
| 289  | 2   | 14  | 153    | 46     | 19.65 | 92        | 108        | 76         | 105 | 108 | 105 | 116  | 86   | 103 | 107 | 106 | 120  | 86   | 112 | 112 | 110 | 123  | 81   | 108  | 112        | 1        | 1              | 0            | 0              | 1                     | 20          | 9.20        | 0    |
| 290  | 1   | 13  | 170    | 52     | 17.99 | 65        | 103        | 64         | 86  | 87  | 92  | 110  | 73   | 90  | 94  | 89  | 110  | 75   | 96  | 98  | 97  | 110  | 74   | 95   | 98         | 1        | 1              | 1            | 0              | 1                     | 33          | 6.50        | 0    |
| 291  | 2   | 13  | 154    | 43     | 18.13 | 104       | 125        | 74         | 114 | 116 | 122 | 130  | 78   | 119 | 122 | 111 | 131  | 71   | 120 | 121 | 125 | 135  | 60   | 128  | 128        | 1        | 1              | 1            | 0              | 0                     | 24          | 10.40       | 1    |
| 293  | 1   | 14  | 153    | 45     | 19.22 | 95        | 105        | 66         | 103 | 105 | 106 | 119  | 71   | 107 | 108 | 108 | 122  | 58   | 100 | 106 | 115 | 109  | 63   | 112  | 115        | 0        | 0              | 0            | 0              | 1                     | 20          | 9.50        | 0    |
| 294  | 1   | 14  | 166    | 60     | 21.77 | 72        | 109        | 58         | 85  | 80  | 76  | 118  | 71   | 80  | 81  | 81  | 113  | 70   | 78  | 81  | 77  | 111  | 67   | 72   | 85         | 1        | 0              | 0            | 0              | 1                     | 13          | 7.20        | 0    |
| 295  | 1   | 12  | 158    | 54     | 21.63 | 94        | 129        | 80         | 101 | 100 | 95  | 132  | 82   | 99  | 103 | 103 | 133  | 76   | 99  | 99  | 101 | 134  | 77   | 104  | 104        | 1        | 1              | 0            | 0              | 0                     | 10          | 9.40        | 0    |
| 297  | 1   | 15  | 172    | 62     | 20.96 | 72        | 94         | 50         | 92  | 96  | 94  | 108  | 68   | 88  | 91  | 89  | 114  | 72   | 90  | 89  | 91  | 112  | 70   | 93   | 96         | 0        | 0              | 0            | 0              | 1                     | 24          | 7.20        | 0    |
| 299  | 2   | 13  | 148    | 40     | 18.26 | 87        | 114        | 70         | 85  | 95  | 87  | 116  | 79   | 90  | 86  | 84  | 117  | 76   | 86  | 96  | 84  | 116  | 78   | 87   | 96         | 0        | 0              | 1            | 0              | 1                     | 9           | 8.70        | 0    |
| 301  | 1   | 14  | 170    | 55     | 19.03 | 77        | 119        | 62         | 98  | 89  | 90  | 114  | 69   | 92  | 94  | 94  | 113  | 69   | 97  | 96  | 100 | 109  | 70   | 96   | 100        | 0        | 0              | 1            | 1              | 1                     | 23          | 7.70        | 0    |
| 302  | 2   | 13  | 162    | 53     | 20.20 | 86        | 122        | 80         | 112 | 93  | 95  | 126  | 88   | 96  | 105 | 97  | 124  | 77   | 102 | 100 | 97  | 123  | 78   | 101  | 112        | 0        | 0              | 0            | 0              | 1                     | 26          | 8.60        | 0    |
| 303  | 2   | 13  | 154    | 45     | 18.97 | 101       | 98         | 62         | 112 | 112 | 113 | 108  | 67   | 108 | 111 | 110 | 109  | 67   | 113 | 110 | 109 | 115  | 66   | 106  | 113        | 1        | 0              | 1            | 0              | 1                     | 12          | 10.10       | 0    |
| 304  | 2   | 13  | 170    | 75     | 25.95 | 86        | 118        | 66         | 93  | 94  | 93  | 134  | 58   | 99  | 98  | 102 | 116  | 70   | 100 | 102 | 111 | 122  | 70   | 103  | 111        | 0        | 1              | 0            | 0              | 0                     | 25          | 8.60        | 0    |
| 305  | 2   | 14  | 166    | 45     | 16.33 | 84        | 115        | 74         | 93  | 86  | 88  | 121  | 84   | 90  | 90  | 85  | 119  | 72   | 93  | 89  | 101 | 117  | 80   | 102  | 102        | 0        | 0              | 0            | 0              | 1                     | 18          | 8.40        | 0    |
| 307  | 2   | 13  | 156    | 46     | 18.90 | 85        | 123        | 74         | 105 | 100 | 98  | 132  | 74   | 99  | 94  | 96  | 136  | 71   | 101 | 106 | 100 | 130  | 77   | 98   | 106        | 1        | 0              | 0            | 0              | 1                     | 21          | 8.50        | 0    |
| 308  | 2   | 14  | 157    | 62     | 25.15 | 82        | 118        | 81         | 107 | 112 | 114 | 131  | 81   | 118 | 116 | 118 | 125  | 85   | 120 | 121 | 118 | 128  | 82   | 127  | 127        | 1        | 1              | 0            | 1              | 1                     | 45          | 8.20        | 1    |
| 309  | 1   | 14  | 165    | 56     | 20.57 | 84        | 113        | 70         | 101 | 104 | 103 | 125  | 86   | 104 | 104 | 102 | 123  | 82   | 105 | 103 | 105 | 112  | 77   | 103  | 105        | 1        | 0              | 1            | 0              | 1                     | 21          | 8.40        | 0    |
| 312  | 1   | 13  | 160    | 66     | 25.78 | 76        | 114        | 66         | 91  | 87  | 91  | 122  | 74   | 80  | 87  | 86  | 122  | 74   | 87  | 87  | 89  | 119  | 70   | 90   | 91         | 1        | 0              | 1            | 0              | 1                     | 15          | 7.60        | 0    |
| 314  | 1   | 13  | 153    | 45     | 19.22 | 76        | 131        | 62         | 104 | 96  | 103 | 151  | 68   | 101 | 117 | 112 | 145  | 57   | 102 | 117 | 107 | 142  | 74   | 108  | 117        | 1        | 0              | 1            | 0              | 1                     | 41          | 7.60        | 1    |
| 315  | 1   | 13  | 166    | 65     | 23.59 | 81        | 123        | 61         | 102 | 101 | 94  | 131  | 83   | 101 | 103 | 103 | 134  | 84   | 108 | 103 | 101 | 138  | 85   | 100  | 108        | 1        | 0              | 0            | 0              | 1                     | 27          | 8.10        | 0    |
| 400  | 1   | 12  | 150    | 38     | 16.89 | 82        | 137        | 89         | 89  | 86  | 81  |      |      | 90  | 85  | 89  |      |      | 85  | 88  | 86  |      |      | 90   | 90         | 0        | 0              | 0            | 0              | 1                     | 8           | 8.20        | 0    |
| 401  | 1   | 13  | 135    | 30     | 16.46 | 82        | 114        | 71         | 80  | 80  | 84  | 119  | 83   | 88  | 90  | 82  | 121  | 82   | 82  | 85  | 97  | 119  | 89   | 88   | 97         | 1        | 0              | 0            | 0              | 1                     | 15          | 8.20        | 0    |
| 402  | 1   | 11  | 155    | 41     | 17.07 | 78        | 99         | 62         | 80  | 87  | 97  | 113  | 72   | 90  | 93  | 89  | 112  | 67   | 87  | 87  | 95  | 110  | 65   | 91   | 97         | 0        | 0              | 0            | 0              | 0                     | 19          | 7.80        | 0    |
| 403  | 1   | 12  | 155    | 40     | 16.65 | 88        | 96         | 54         | 94  | 100 | 98  | 113  | 74   | 104 | 101 | 103 | 114  | 65   | 103 | 101 | 104 | 113  | 65   | 104  | 104        | 1        | 0              | 0            | 0              | 1                     | 16          | 8.80        | 0    |
| 404  | 1   | 11  | 152    | 52     | 22.51 | 92        | 110        | 65         | 100 | 102 | 99  | 125  | 65   | 101 | 97  | 94  | 132  | 82   | 97  | 100 | 96  | 131  | 72   | 98   | 102        | 0        | 0              | 0            | 1              | 0                     | 10          | 9.20        | 0    |
| 405  | 1   | 11  | 168    | 63     | 22.32 | 98        | 109        | 48         | 104 | 108 | 102 | 125  | 79   | 106 | 109 | 106 | 124  | 64   | 111 | 116 | 112 | 119  | 76   | 107  | 116        | 1        | 0              | 0            | 0              | 1                     | 18          | 9.80        | 0    |
| 406  | 1   | 11  | 146    | 40     | 18.77 | 79        | 102        | 63         | 99  | 97  | 107 | 115  | 75   | 100 | 107 | 98  | 114  | 72   | 104 | 105 | 100 | 112  | 72   | 102  | 107        | 0        | 0              | 0            | 0              | 1                     | 28          | 7.90        | 0    |
| 407  | 1   | 11  | 156    | 50     | 20.55 | 87        | 100        | 64         | 94  | 96  | 95  | 116  | 88   | 98  | 98  | 92  | 112  | 84   | 105 | 96  | 103 | 103  | 57   | 97   | 105        | 1        | 0              | 0            | 0              | 0                     | 18          | 8.70        | 0    |
| 408  | 1   | 12  | 161    | 63     | 24.30 | 82        | 135        | 86         | 86  | 91  | 87  | 140  | 90   | 91  | 88  | 89  | 137  | 89   | 96  | 89  | 89  | 131  | 74   | 94   | 96         | 0        | 0              | 0            | 0              | 1                     | 14          | 8.20        | 0    |
| 409  | 1   | 11  | 142    | 32     | 15.87 | 65        | 91         | 60         | 77  | 84  | 82  | 102  | 75   | 94  | 90  | 87  | 97   | 67   | 84  | 92  | 88  | 106  | 56   | 89   | 94         | 1        | 0              | 0            | 1              | 1                     | 29          | 6.50        | 0    |
| 410  | 1   | 12  | 158    | 48     | 19.23 | 81        | 118        | 70         | 110 | 116 | 108 | 122  | 85   | 104 | 114 | 113 | 122  | 76   | 116 | 109 | 108 | 113  | 83   | 116  | 116        | 0        | 0              | 0            | 0              | 1                     | 35          | 8.10        | 0    |
| 411  | 1   | 11  | 158    | 63     | 25.24 | 76        | 127        | 56         | 96  | 100 | 94  | 137  | 67   | 103 | 105 | 90  | 135  | 71   | 104 | 102 | 103 | 138  | 77   | 104  | 105        | 1        | 0              | 0            | 0              | 0                     | 29          | 7.60        | 0    |
| 412  | 1   | 10  | 140    | 39     | 19.90 | 77        | 106        | 56         | 85  | 86  | 92  | 108  | 69   | 93  | 102 | 88  | 105  | 66   | 92  | 92  | 93  | 104  | 73   | 90   | 102        | 0        | 0              | 0            | 0              | 0                     | 25          | 7.70        | 0    |
| 413  | 1   | 12  | 152    | 38     | 16.45 | 89        | 115        | 63         | 118 | 118 | 117 | 126  | 75   | 119 | 122 | 117 | 122  | 70   | 117 | 120 | 123 | 126  | 72   | 130  | 130        | 0        | 0              | 0            | 1              | 1                     | 41          | 8.90        | 1    |
| 414  | 1   | 10  | 146    | 35     | 16.42 | 72        | 103        | 60         | 93  | 86  | 91  | 116  | 71   | 89  | 96  | 87  | 109  | 76   | 99  | 91  | 87  | 118  | 72   | 86   | 99         | 0        | 0              | 0            | 0              | 1                     | 27          | 7.20        | 0    |
| 415  | 1   | 12  | 160    | 51     | 19.92 | 77        | 126        | 65         | 90  | 101 | 94  | 113  | 64   | 90  | 100 | 97  | 119  | 73   | 97  | 105 | 94  | 116  | 67   | 97   | 105        | 1        | 0              | 0            | 1              | 1                     | 28          | 7.70        | 0    |
| 416  | 1   | 11  | 148    | 41     | 18.72 | 81        | 118        | 50         | 106 | 87  | 90  | 124  | 67   | 94  | 97  | 98  | 110  | 65   | 86  | 92  | 104 | 125  | 63   | 95   | 106        | 0        | 1              | 0            | 0              | 1                     | 25          | 8.10        | 0    |
| 417  | 1   | 11  | 146    | 38     | 17.83 | 78        | 104        | 73         | 88  | 72  | 81  | 112  | 77   | 84  | 95  | 90  | 113  | 77   | 91  | 88  | 85  | 116  | 79   | 81   | 95         | 0        | 0              | 0            | 1              | 0                     | 17          | 7.80        | 0    |
| 419  | 1   | 11  | 152    | 46     | 19.91 | 99        | 112        | 69         | 109 | 113 | 109 | 125  | 81   | 113 | 113 | 110 | 122  | 76   | 114 | 116 | 113 | 136  | 76   | 114  | 116        | 1        | 0              | 0            | 0              | 0                     | 17          | 9.90        | 0    |
| 421  | 1   | 10  | 143    | 30     | 14.67 | 82        | 107        | 61         | 88  | 92  | 96  | 112  | 74   | 97  | 95  | 96  | 109  | 74   | 99  | 93  | 94  | 115  | 73   | 89   | 99         | 0        | 0              | 0            | 0              | 1                     | 17          | 8.20        | 0    |
| 422  | 1   | 11  | 152    | 62     | 26.84 | 65        | 113        | 67         | 90  | 80  | 90  | 114  | 78   | 86  | 91  | 77  | 109  | 75   | 88  | 75  | 81  | 128  | 77   | 90   | 91         | 1        | 0              | 0            | 1              | 1                     | 26          | 6.50        | 0    |
| 424  | 1   | 10  | 143    | 35     | 17.12 | 81        | 108        | 73         | 104 | 96  | 94  | 115  | 78   | 89  | 92  | 89  | 113  | 76   | 90  | 87  | 92  | 117  | 73   | 89   | 104        | 0        | 0              | 0            | 1              | 1                     | 23          | 8.10        | 0    |
| 426  | 2   | 9   | 143    | 40     | 19.56 | 73        | 120        | 76         | 73  | 80  | 84  | 115  | 80   | 76  | 82  | 81  | 131  | 98   | 85  | 78  | 90  | 127  | 88   | 77   | 90         | 0        | 1              | 0            | 0              | 1                     | 17          | 7.30        | 0    |
| 427  | 1   | 10  | 141    | 35     | 17.60 | 85        | 109        | 66         | 95  | 97  | 99  | 119  | 79   | 101 | 97  | 93  | 119  | 69   | 90  |     | 116 | 81   |      |      |            |          |                |              |                |                       |             |             |      |

# Test group

| code | sex | age | height | weight | BMI   | supine HR | supine SBP | supine DBP | HR1 | HR2 | HR3 | SBP3 | DBP3 | HR4 | HR5 | HR6 | SBP6 | DBP6 | HR7 | HR8 | HR9 | SBP9 | DBP9 | HR10 | highest HR | car sick | family history | water intake | sleeping hours | school-induced burden | HR increase | supine HR10 | POTS  |   |
|------|-----|-----|--------|--------|-------|-----------|------------|------------|-----|-----|-----|------|------|-----|-----|-----|------|------|-----|-----|-----|------|------|------|------------|----------|----------------|--------------|----------------|-----------------------|-------------|-------------|-------|---|
| 435  | 2   | 9   | 137    | 30     | 15.98 | 74        | 103        | 61         | 81  | 89  | 96  | 118  | 72   | 96  | 100 | 97  | 123  | 84   | 87  | 99  | 98  | 110  | 78   | 87   | 100        | 1        | 0              | 0            | 0              | 0                     | 1           | 26          | 7.40  | 0 |
| 436  | 1   | 10  | 141    | 37     | 18.61 | 75        | 103        | 62         | 88  | 86  | 82  | 113  | 78   | 80  | 91  | 85  | 119  | 70   | 92  | 91  | 82  | 112  | 78   | 89   | 92         | 0        | 0              | 0            | 0              | 0                     | 1           | 17          | 7.50  | 0 |
| 437  | 2   | 10  | 125    | 25     | 16.00 | 87        | 111        | 62         | 92  | 95  | 96  | 127  | 82   | 95  | 100 | 105 | 124  | 77   | 102 | 110 | 92  | 124  | 83   | 103  | 110        | 1        | 1              | 0            | 0              | 0                     | 0           | 23          | 8.70  | 0 |
| 438  | 2   | 10  | 139    | 28     | 14.49 | 85        | 111        | 67         | 101 | 96  | 91  | 118  | 70   | 102 | 101 | 101 | 115  | 78   | 107 | 107 | 99  | 111  | 83   | 106  | 107        | 1        | 1              | 0            | 0              | 0                     | 1           | 22          | 8.50  | 0 |
| 439  | 2   | 10  | 140    | 33     | 16.84 | 115       | 139        | 80         | 122 | 122 | 128 | 144  | 96   | 122 | 123 | 128 | 159  | 93   | 121 | 125 | 126 | 142  | 88   | 125  | 128        | 0        | 0              | 0            | 0              | 0                     | 0           | 13          | 11.50 | 0 |
| 440  | 2   | 10  | 141    | 44     | 22.13 | 88        | 109        | 48         | 93  | 94  | 102 | 117  | 69   | 106 | 104 | 101 | 111  | 72   | 111 | 107 | 113 | 109  | 71   | 105  | 113        | 1        | 0              | 0            | 0              | 0                     | 1           | 25          | 8.80  | 0 |
| 441  | 1   | 10  | 145    | 39     | 18.55 | 102       | 110        | 70         | 120 | 124 | 125 | 122  | 80   | 121 | 120 | 120 | 118  | 81   | 125 | 119 | 118 | 116  | 76   | 121  | 125        | 0        | 0              | 0            | 0              | 0                     | 0           | 23          | 10.20 | 0 |
| 442  | 1   | 8   | 140    | 45     | 22.96 | 72        | 116        | 57         | 78  | 75  | 74  | 115  | 60   | 81  | 74  | 77  | 116  | 54   | 79  | 77  | 81  | 118  | 56   | 79   | 81         | 1        | 0              | 0            | 0              | 0                     | 0           | 9           | 7.20  | 0 |
| 444  | 1   | 10  | 131    | 34     | 19.81 | 87        | 103        | 65         | 102 | 102 | 105 | 115  | 78   | 101 | 99  | 103 | 114  | 78   | 104 | 107 | 99  | 117  | 80   | 106  | 107        | 1        | 0              | 0            | 0              | 0                     | 1           | 20          | 8.70  | 0 |
| 445  | 1   | 10  | 145    | 35     | 16.65 | 92        | 108        | 65         | 96  | 97  | 101 | 113  | 74   | 98  | 97  | 103 | 107  | 72   | 103 | 96  |     | 110  | 73   |      | 103        | 0        | 0              | 0            | 0              | 0                     | 0           | 11          | 9.20  | 0 |
| 446  | 1   | 10  | 137    | 35     | 18.65 | 86        | 94         | 45         | 106 | 105 | 106 | 102  | 68   | 105 | 112 | 110 | 105  | 69   | 113 | 109 | 105 | 97   | 60   | 109  | 113        | 0        | 1              | 0            | 0              | 0                     | 1           | 27          | 8.60  | 0 |
| 448  | 1   | 10  | 142    | 36     | 17.85 | 96        | 108        | 62         | 105 | 106 | 107 | 88   | 67   | 109 | 110 | 105 | 103  | 52   | 109 | 117 | 114 | 110  | 73   | 103  | 117        | 1        | 0              | 0            | 0              | 0                     | 0           | 21          | 9.60  | 0 |
| 450  | 1   | 10  | 148    | 36     | 16.44 | 100       | 127        | 63         | 113 | 114 | 117 | 121  | 70   | 118 | 116 | 114 | 125  | 76   | 117 | 109 | 112 | 129  | 81   | 112  | 118        | 0        | 0              | 0            | 0              | 0                     | 0           | 18          | 10.00 | 0 |
| 451  | 2   | 9   | 143    | 35     | 17.12 | 90        | 124        | 71         | 97  | 100 | 101 | 121  | 77   | 95  | 103 | 105 | 119  | 83   | 97  | 103 | 100 | 113  | 77   | 98   | 105        | 1        | 0              | 0            | 0              | 0                     | 0           | 15          | 9.00  | 0 |
| 452  | 2   | 10  | 140    | 30     | 15.31 | 90        | 110        | 58         | 116 | 105 | 112 | 123  | 64   | 107 | 94  | 98  | 121  | 62   | 102 | 101 | 96  | 122  | 51   | 107  | 116        | 1        | 0              | 0            | 1              | 1                     | 26          | 9.00        | 0     |   |
| 453  | 2   | 11  | 145    | 46     | 21.88 | 96        | 117        | 82         | 110 | 104 | 107 | 130  | 87   | 113 | 108 | 103 | 133  | 81   | 108 | 111 | 105 | 138  | 77   | 93   | 113        | 0        | 0              | 0            | 0              | 0                     | 1           | 17          | 9.60  | 0 |
| 454  | 2   | 10  | 140    | 31     | 15.82 | 97        | 107        | 69         | 105 | 106 | 105 | 115  | 79   | 107 | 108 | 100 | 107  | 72   | 104 | 112 | 106 | 113  | 46   | 109  | 112        | 0        | 0              | 0            | 0              | 0                     | 1           | 15          | 9.70  | 0 |
| 455  | 2   | 10  | 150    | 57     | 25.33 | 93        | 113        | 63         | 96  | 113 | 115 | 124  | 71   | 104 | 109 | 113 | 123  | 71   | 115 | 110 | 106 | 126  | 73   | 106  | 115        | 0        | 0              | 0            | 0              | 0                     | 0           | 22          | 9.30  | 0 |
| 456  | 2   | 11  | 149    | 39     | 17.57 | 82        | 103        | 60         | 93  | 100 | 101 | 114  | 76   | 103 | 100 | 103 | 114  | 82   | 95  | 97  | 98  | 121  | 80   | 100  | 103        | 0        | 1              | 0            | 0              | 0                     | 1           | 21          | 8.20  | 0 |
| 458  | 1   | 11  | 145    | 35     | 16.65 | 85        | 102        | 43         | 101 | 102 | 99  | 112  | 72   | 96  | 98  | 96  | 120  | 62   | 98  | 100 | 97  | 110  | 67   | 95   | 102        | 0        | 0              | 0            | 0              | 0                     | 1           | 17          | 8.50  | 0 |
| 459  | 2   | 10  | 141    | 35     | 17.60 | 105       | 114        | 71         | 112 | 112 | 116 | 126  | 82   | 112 | 120 | 123 | 126  | 79   | 125 | 120 | 118 | 126  | 88   | 126  | 126        | 1        | 0              | 1            | 1              | 1                     | 21          | 10.50       | 0     |   |
| 460  | 1   | 10  | 146    | 40     | 18.77 | 93        | 103        | 70         | 99  | 95  | 89  | 119  | 66   | 99  | 92  | 100 | 131  | 76   | 92  | 94  | 97  | 127  | 79   | 103  | 103        | 0        | 0              | 0            | 0              | 1                     | 1           | 10          | 9.30  | 0 |
| 461  | 2   | 10  | 145    | 39     | 18.55 | 72        | 117        | 55         | 84  | 93  | 85  | 127  | 77   | 94  | 96  | 90  | 120  | 71   | 93  | 97  | 91  | 129  | 76   | 95   | 97         | 0        | 0              | 0            | 0              | 0                     | 0           | 25          | 7.20  | 0 |
| 462  | 1   | 11  | 160    | 63     | 24.61 | 105       | 147        | 71         | 122 | 120 | 110 | 145  | 97   | 107 | 111 | 108 | 148  | 87   | 104 | 111 | 105 | 161  | 83   | 104  | 122        | 1        | 0              | 0            | 0              | 0                     | 0           | 17          | 10.50 | 0 |
| 464  | 2   | 10  | 155    | 40     | 16.65 | 84        | 112        | 77         | 107 | 108 | 104 | 119  | 83   | 105 | 116 | 112 | 116  | 79   | 106 | 110 | 107 | 114  | 79   | 106  | 116        | 0        | 0              | 0            | 0              | 0                     | 0           | 32          | 8.40  | 0 |
| 465  | 2   | 10  | 154    | 56     | 23.61 | 81        | 121        | 72         | 120 | 107 | 111 | 127  | 84   | 110 | 107 | 106 | 128  | 81   | 110 | 108 | 110 | 127  | 89   | 106  | 120        | 1        | 0              | 0            | 0              | 0                     | 1           | 39          | 8.10  | 0 |
| 466  | 1   | 11  | 144    | 29     | 13.99 | 94        | 109        | 77         | 101 | 102 | 109 | 123  | 93   | 105 | 106 | 108 | 114  | 80   | 111 | 103 | 113 | 119  | 86   | 101  | 113        | 0        | 0              | 0            | 0              | 0                     | 1           | 19          | 9.40  | 0 |
| 468  | 2   | 10  | 151    | 29     | 12.72 | 100       | 105        | 68         | 112 | 113 | 98  | 115  | 69   | 114 | 105 | 101 | 120  | 79   | 105 | 104 | 108 | 114  | 74   | 107  | 114        | 1        | 1              | 0            | 0              | 0                     | 0           | 14          | 10.00 | 0 |
| 469  | 1   | 11  | 151    | 49     | 21.49 | 97        | 124        | 60         | 108 | 115 | 118 | 132  | 86   | 113 | 111 | 110 | 127  | 88   | 116 | 108 | 108 | 126  | 86   | 118  | 118        | 0        | 0              | 0            | 1              | 1                     | 21          | 9.70        | 0     |   |
| 470  | 2   | 10  | 149    | 26     | 11.71 | 93        | 99         | 64         | 104 | 102 | 108 | 110  | 78   | 110 | 113 | 108 | 110  | 74   | 111 | 114 | 113 | 104  | 66   | 112  | 114        | 1        | 0              | 0            | 0              | 0                     | 0           | 21          | 9.30  | 0 |
| 471  | 2   | 10  | 152    | 67     | 29.00 | 100       | 114        | 53         | 98  | 98  | 110 | 149  | 128  | 105 | 124 | 90  | 164  | 143  | 119 | 112 | 111 | 141  | 60   | 115  | 124        | 1        | 0              | 0            | 0              | 0                     | 1           | 24          | 10.00 | 0 |
| 472  | 1   | 11  | 153    | 42     | 17.94 | 95        | 112        | 69         | 99  | 100 | 105 | 130  | 88   | 103 | 100 | 98  | 121  | 86   | 113 | 107 | 109 | 121  | 76   | 102  | 113        | 1        | 0              | 0            | 0              | 0                     | 1           | 18          | 9.50  | 0 |
| 473  | 2   | 10  | 138    | 36     | 18.90 | 85        | 108        | 70         | 97  | 98  | 104 | 103  | 67   | 113 | 108 | 97  | 104  | 70   | 116 | 97  | 103 | 110  | 72   | 104  | 116        | 0        | 0              | 0            | 0              | 0                     | 0           | 31          | 8.50  | 0 |
| 474  | 2   | 12  | 131    | 35     | 20.40 | 98        | 111        | 71         | 121 | 107 | 122 | 124  | 64   | 111 | 107 | 112 | 114  | 82   | 112 | 110 | 112 | 120  | 80   | 114  | 122        | 1        | 0              | 0            | 1              | 1                     | 24          | 9.80        | 0     |   |
| 475  | 1   | 10  | 155    | 58     | 24.14 | 84        | 110        | 63         | 110 | 109 | 109 | 111  | 74   | 110 | 111 | 110 | 108  | 66   | 112 | 111 | 115 | 108  | 73   | 114  | 115        | 1        | 0              | 0            | 0              | 0                     | 1           | 31          | 8.40  | 0 |
| 477  | 2   | 10  | 137    | 27     | 14.39 | 96        | 97         | 47         | 98  | 112 | 115 | 107  | 66   | 114 | 112 | 120 | 114  | 62   | 114 | 117 | 118 | 116  | 67   | 114  | 120        | 1        | 0              | 0            | 1              | 1                     | 24          | 9.60        | 1     |   |
| 478  | 1   | 11  | 140    | 31     | 15.82 | 99        | 116        | 68         | 117 | 102 | 105 | 127  | 79   | 101 | 110 | 103 | 124  | 78   | 100 | 103 | 107 | 115  | 81   | 110  | 117        | 0        | 0              | 0            | 0              | 1                     | 1           | 18          | 9.90  | 0 |
| 479  | 1   | 11  | 148    | 39     | 17.80 | 86        | 113        | 55         | 98  | 100 | 108 | 121  | 71   | 105 | 101 | 104 | 114  | 61   | 101 | 103 | 104 | 116  | 61   | 108  | 108        | 0        | 0              | 0            | 0              | 0                     | 0           | 22          | 8.60  | 0 |
| 480  | 1   | 11  | 165    | 50     | 18.37 | 98        | 117        | 64         | 109 | 108 | 108 | 124  | 82   | 102 | 110 | 110 | 126  | 81   | 113 | 106 | 107 | 126  | 80   | 110  | 113        | 0        | 1              | 0            | 0              | 0                     | 0           | 15          | 9.80  | 0 |
| 481  | 1   | 10  | 157    | 43     | 17.44 | 86        | 123        | 61         | 115 | 114 | 114 | 124  | 85   | 111 | 114 | 112 | 126  | 88   | 111 | 114 | 111 | 127  | 82   | 115  | 115        | 1        | 0              | 0            | 0              | 0                     | 0           | 29          | 8.60  | 0 |
| 483  | 1   | 11  | 140    | 36     | 18.37 | 72        | 104        | 57         | 100 | 96  | 92  | 118  | 61   | 93  | 98  | 90  | 121  | 60   | 97  | 98  | 93  | 115  | 71   | 99   | 100        | 0        | 0              | 0            | 0              | 0                     | 1           | 28          | 7.20  | 0 |
| 484  | 1   | 12  | 153    | 50     | 21.36 | 82        | 102        | 54         | 112 | 110 | 111 | 115  | 65   | 113 | 116 | 112 | 109  | 69   | 112 | 111 | 112 | 112  | 67   | 118  | 118        | 0        | 0              | 0            | 0              | 0                     | 0           | 36          | 8.20  | 0 |
| 485  | 1   | 12  | 146    | 40     | 18.77 | 77        | 112        | 59         | 86  | 87  | 86  | 112  | 75   | 90  | 91  | 92  | 117  | 70   | 95  | 92  | 90  | 110  | 77   | 91   | 95         | 1        | 0              | 0            | 0              | 0                     | 1           | 18          | 7.70  | 0 |
| 486  | 1   | 11  | 165    | 53     | 19.47 | 88        | 112        | 53         | 108 | 110 | 116 | 122  | 74   | 106 | 113 | 106 | 109  | 66   | 109 | 109 | 106 | 113  | 73   | 115  | 116        | 0        | 0              | 0            | 0              | 0                     | 1           | 28          | 8.80  | 0 |
| 487  | 1   | 11  | 144    | 34     | 16.40 | 80        | 98         | 65         | 85  | 91  | 91  | 103  | 70   | 90  | 91  | 93  | 110  | 66   | 100 | 95  | 98  | 108  | 72   | 96   | 100        | 1        | 0              | 0            | 0              | 0                     | 1           | 20          | 8.00  | 0 |
| 488  | 1   | 10  | 137    | 39     | 20.78 | 86        | 101        | 73         | 106 | 102 | 105 | 115  | 74   | 110 | 101 | 94  | 118  | 73   | 103 | 107 | 106 | 116  | 77   | 102  | 110        | 0        | 0              | 0            | 0              | 0                     | 1           | 24          | 8.60  | 0 |
| 489  | 1   | 11  |        |        |       |           |            |            |     |     |     |      |      |     |     |     |      |      |     |     |     |      |      |      |            |          |                |              |                |                       |             |             |       |   |

# Test group

| code | sex | age | height | weight | BMI   | supine HR | supine SBP | supine DBP | HR1 | HR2 | HR3 | SBP3 | DBP3 | HR4 | HR5 | HR6 | SBP6 | DBP6 | HR7 | HR8 | HR9 | SBP9 | DBP9 | HR10 | highest HR | car sick | family history | water intake | sleeping hours | school-induced burden | HR increase | supine HR10 | POTS |
|------|-----|-----|--------|--------|-------|-----------|------------|------------|-----|-----|-----|------|------|-----|-----|-----|------|------|-----|-----|-----|------|------|------|------------|----------|----------------|--------------|----------------|-----------------------|-------------|-------------|------|
| 502  | 1   | 11  | 156    | 40     | 16.44 | 78        | 108        | 52         | 93  | 90  | 89  | 118  | 67   | 91  | 90  | 89  | 113  | 65   | 89  | 88  | 84  | 111  | 65   | 83   | 93         | 0        | 0              | 0            | 0              | 0                     | 15          | 7.80        | 0    |
| 505  | 1   | 11  | 153    | 46     | 19.65 | 88        | 106        | 62         | 109 | 107 | 99  | 116  | 71   | 98  | 100 | 97  | 118  | 77   | 103 | 110 | 105 | 116  | 76   | 112  | 112        | 1        | 0              | 0            | 0              | 1                     | 24          | 8.80        | 0    |
| 506  | 1   | 12  | 157    | 44     | 17.85 | 88        | 106        | 57         | 104 | 104 | 107 | 114  | 76   | 111 | 111 | 108 | 115  | 72   | 110 | 108 | 106 | 119  | 60   | 116  | 116        | 0        | 0              | 0            | 0              | 0                     | 28          | 8.80        | 0    |
| 507  | 1   | 11  | 150    | 44     | 19.56 | 78        | 111        | 53         | 93  | 93  | 94  | 119  | 70   | 100 | 88  | 92  | 119  | 76   | 90  | 95  | 88  | 119  | 66   | 93   | 100        | 1        | 0              | 0            | 0              | 1                     | 22          | 7.80        | 0    |
| 508  | 1   | 12  | 144    | 32     | 15.43 | 85        | 104        | 63         | 98  | 100 | 106 | 112  | 78   | 96  | 101 | 107 | 113  | 76   | 105 | 106 | 105 | 108  | 69   | 111  | 111        | 1        | 0              | 0            | 0              | 1                     | 26          | 8.50        | 0    |
| 509  | 1   | 11  | 150    | 49     | 21.78 | 80        | 113        | 67         | 106 | 107 | 101 | 125  | 81   | 100 | 102 | 98  | 111  | 83   | 100 | 99  | 98  | 119  | 78   | 99   | 107        | 1        | 0              | 0            | 0              | 1                     | 27          | 8.00        | 0    |
| 511  | 2   | 11  | 154    | 53     | 22.35 | 79        | 111        | 65         | 102 | 96  | 101 | 128  | 65   | 94  | 103 | 90  | 114  | 69   | 102 | 96  | 89  | 127  | 71   | 95   | 102        | 1        | 0              | 0            | 0              | 1                     | 23          | 7.90        | 0    |
| 512  | 2   | 11  | 161    | 59     | 22.76 | 92        | 107        | 60         | 110 | 103 | 104 | 127  | 84   | 110 | 109 | 98  | 134  | 69   | 113 | 108 | 107 | 123  | 81   | 110  | 113        | 1        | 0              | 0            | 0              | 1                     | 21          | 9.20        | 0    |
| 513  | 2   | 12  | 150    | 39     | 17.33 | 89        | 112        | 76         | 99  | 97  | 102 | 116  | 83   | 104 | 100 | 98  | 112  | 77   | 103 | 108 | 107 | 110  | 81   | 100  | 108        | 0        | 0              | 0            | 0              | 1                     | 19          | 8.90        | 0    |
| 514  | 2   | 11  | 161    | 77     | 29.71 | 73        | 106        | 67         | 83  | 75  | 75  | 118  | 57   | 79  | 79  | 75  | 120  | 76   | 87  | 87  | 84  | 99   | 74   | 82   | 87         | 1        | 0              | 0            | 0              | 1                     | 14          | 7.30        | 0    |
| 515  | 2   | 10  | 153    | 51     | 21.79 | 81        | 128        | 77         | 101 | 94  | 92  | 137  | 73   | 95  | 99  | 98  | 156  | 84   | 109 | 101 | 97  | 153  | 120  | 105  | 109        | 1        | 0              | 0            | 0              | 1                     | 28          | 8.10        | 0    |
| 516  | 2   | 10  | 150    | 38     | 16.89 | 89        | 104        | 45         | 110 | 103 | 96  | 86   | 58   | 110 | 104 | 98  | 105  | 49   | 105 | 104 | 109 | 112  | 44   | 105  | 110        | 1        | 0              | 0            | 0              | 1                     | 21          | 8.90        | 0    |
| 517  | 2   | 11  | 146    | 33     | 15.48 | 97        | 102        | 58         | 117 | 107 | 120 | 110  | 76   | 117 | 115 | 119 | 107  | 73   | 118 | 123 | 114 | 106  | 74   | 120  | 123        | 0        | 0              | 1            | 1              | 1                     | 26          | 9.70        | 1    |
| 518  | 2   | 10  | 159    | 49     | 19.38 | 89        | 99         | 59         | 105 | 108 | 108 | 107  | 68   | 99  | 103 | 107 | 112  | 66   | 103 | 105 | 108 | 108  | 70   | 108  | 108        | 0        | 0              | 0            | 0              | 1                     | 19          | 8.90        | 0    |
| 519  | 2   | 10  | 146    | 34     | 15.95 | 105       | 103        | 62         | 120 | 125 | 120 | 113  | 77   | 129 | 117 | 121 | 115  | 80   | 126 | 119 | 123 | 130  | 88   | 134  | 134        | 0        | 0              | 0            | 0              | 0                     | 29          | 10.50       | 0    |
| 521  | 2   | 10  | 148    | 45     | 20.54 | 96        | 113        | 58         | 119 | 113 | 114 | 115  | 73   | 116 | 121 | 118 | 112  | 74   | 121 | 121 | 117 | 117  | 78   | 118  | 121        | 1        | 0              | 0            | 1              | 1                     | 25          | 9.60        | 0    |
| 523  | 2   | 11  | 154    | 49     | 20.66 | 93        | 111        | 68         | 106 | 107 | 109 | 121  | 78   | 108 | 100 | 111 | 119  | 77   | 106 | 110 | 113 | 118  | 80   | 100  | 113        | 1        | 0              | 0            | 0              | 1                     | 20          | 9.30        | 0    |
| 524  | 2   | 12  | 148    | 58     | 26.48 | 102       | 117        | 69         | 126 | 116 | 117 | 121  | 78   | 127 | 133 | 122 | 91   | 66   | 128 | 125 | 128 | 129  | 81   | 123  | 133        | 1        | 0              | 0            | 1              | 1                     | 31          | 10.20       | 1    |
| 525  | 2   | 11  | 144    | 34     | 16.40 | 75        | 92         | 59         | 92  | 102 | 97  | 108  | 66   | 113 | 118 | 104 | 95   | 63   | 102 | 106 | 99  | 107  | 69   | 107  | 118        | 1        | 0              | 1            | 1              | 1                     | 43          | 7.50        | 1    |
| 526  | 2   | 12  | 161    | 64     | 24.69 | 78        | 139        | 66         | 94  | 92  | 98  | 123  | 73   | 101 | 94  | 98  | 127  | 83   | 95  | 98  | 102 | 129  | 82   | 97   | 102        | 0        | 0              | 0            | 1              | 0                     | 24          | 7.80        | 0    |
| 527  | 2   | 11  | 156    | 44     | 18.08 | 80        | 99         | 60         | 90  | 90  | 85  | 103  | 70   | 89  | 85  | 86  | 107  | 64   | 83  | 84  | 93  | 108  | 64   | 91   | 93         | 1        | 1              | 0            | 1              | 1                     | 13          | 8.00        | 0    |
| 530  | 2   | 11  | 150    | 51     | 22.67 | 98        | 101        | 45         | 119 | 110 | 110 | 114  | 66   | 114 | 114 | 111 | 122  | 56   | 110 | 112 | 109 | 113  | 57   | 118  | 119        | 1        | 0              | 0            | 1              | 1                     | 21          | 9.80        | 0    |
| 531  | 2   | 11  | 157    | 46     | 18.66 | 97        | 101        | 65         | 124 | 113 | 117 | 109  | 80   | 111 | 121 | 112 | 120  | 78   | 119 | 127 | 127 | 114  | 71   | 118  | 127        | 1        | 0              | 0            | 0              | 1                     | 30          | 9.70        | 1    |
| 532  | 2   | 10  | 137    | 30     | 15.98 | 84        | 97         | 64         | 93  | 82  | 92  | 106  | 73   | 93  | 95  | 95  | 112  | 73   | 92  | 92  | 92  | 108  | 73   | 89   | 95         | 1        | 1              | 0            | 0              | 0                     | 11          | 8.40        | 0    |
| 536  | 2   | 10  | 148    | 43     | 19.63 | 85        | 127        | 80         | 112 | 98  | 87  | 134  | 88   | 99  | 91  | 101 | 127  | 87   | 113 | 102 | 99  | 130  | 93   | 95   | 113        | 1        | 0              | 0            | 0              | 1                     | 28          | 8.50        | 0    |
| 537  | 2   | 11  | 145    | 37     | 17.60 | 92        | 111        | 71         | 116 | 101 | 106 | 113  | 71   | 104 | 101 | 97  | 106  | 71   | 101 | 107 | 101 | 111  | 73   | 103  | 116        | 0        | 1              | 0            | 1              | 1                     | 24          | 9.20        | 0    |
| 538  | 2   | 11  | 143    | 36     | 17.60 | 87        | 107        | 51         | 112 | 108 | 108 | 121  | 76   | 113 | 113 | 106 | 121  | 59   | 110 | 111 | 109 | 124  | 73   | 110  | 113        | 1        | 0              | 0            | 0              | 1                     | 26          | 8.70        | 0    |
| 541  | 2   | 10  | 148    | 41     | 18.72 | 80        | 104        | 65         | 94  | 98  | 97  | 116  | 80   | 91  | 96  | 95  | 118  | 79   | 96  | 96  | 104 | 117  | 78   | 97   | 104        | 1        | 0              | 0            | 0              | 1                     | 24          | 8.00        | 0    |
| 543  | 2   | 11  | 161    | 63     | 24.30 | 90        | 113        | 72         | 89  | 92  | 92  | 125  | 91   | 97  | 96  | 96  | 124  | 88   | 95  | 100 | 93  | 119  | 87   | 96   | 100        | 1        | 0              | 0            | 0              | 1                     | 10          | 9.00        | 0    |
| 545  | 1   | 11  | 150    | 42     | 18.67 | 88        | 127        | 57         | 101 | 104 | 107 | 123  | 64   | 109 | 105 | 109 | 122  | 66   | 112 | 107 | 108 | 124  | 60   | 112  | 112        | 0        | 0              | 0            | 1              | 0                     | 24          | 8.80        | 0    |
| 549  | 2   | 11  | 158    | 70     | 28.04 | 72        | 110        | 66         | 75  | 84  | 84  | 128  | 87   | 81  | 90  | 86  | 125  | 80   | 86  | 75  | 88  | 121  | 81   | 89   | 90         | 1        | 0              | 0            | 0              | 1                     | 18          | 7.20        | 0    |
| 550  | 2   | 10  | 130    | 27     | 15.98 | 84        | 109        | 70         | 105 | 108 | 102 | 116  | 81   | 112 | 114 | 107 | 113  | 74   | 104 | 108 | 111 | 112  | 74   | 101  | 114        | 1        | 0              | 0            | 0              | 0                     | 30          | 8.40        | 0    |
| 552  | 2   | 11  | 160    | 47     | 18.36 | 95        | 133        | 76         | 116 | 111 | 103 | 142  | 85   | 117 | 109 | 107 | 138  | 91   | 105 | 111 | 98  | 136  | 92   | 105  | 117        | 0        | 0              | 0            | 0              | 1                     | 22          | 9.50        | 0    |
| 553  | 2   | 12  | 157    | 43     | 17.44 | 83        | 119        | 70         | 106 | 106 | 100 | 130  | 70   | 105 | 101 | 108 | 126  | 64   | 101 | 102 | 107 | 124  | 73   | 102  | 108        | 0        | 0              | 0            | 1              | 1                     | 25          | 8.30        | 0    |
| 554  | 1   | 11  | 153    | 35     | 14.95 | 75        | 114        | 76         | 93  | 83  | 91  | 131  | 89   | 89  | 89  | 89  | 121  | 86   | 91  | 89  | 90  | 127  | 85   | 90   | 93         | 0        | 0              | 0            | 0              | 0                     | 18          | 7.50        | 0    |
| 556  | 1   | 11  | 153    | 42     | 17.94 | 78        | 118        | 62         | 86  | 89  | 90  | 115  | 77   | 89  | 91  | 90  | 114  | 75   | 93  | 91  | 90  | 118  | 74   | 89   | 93         | 1        | 0              | 0            | 0              | 1                     | 15          | 7.80        | 0    |
| 560  | 1   | 11  | 156    | 70     | 28.76 | 78        | 113        | 48         | 88  | 94  | 93  | 115  | 73   | 94  | 99  | 98  | 168  | 144  | 98  | 93  | 96  | 111  | 57   | 93   | 99         | 1        | 0              | 0            | 1              | 1                     | 21          | 7.80        | 0    |
| 562  | 2   | 12  | 158    | 48     | 19.23 | 84        | 115        | 60         | 92  | 108 | 105 | 123  | 73   | 100 | 109 | 103 | 133  | 69   | 110 | 115 | 116 | 121  | 71   | 107  | 116        | 1        | 0              | 0            | 0              | 1                     | 32          | 8.40        | 0    |
| 564  | 2   | 12  | 158    | 49     | 19.63 | 76        | 109        | 65         | 100 | 104 | 100 | 120  | 84   | 107 | 100 | 101 | 116  | 72   | 107 | 104 | 98  | 126  | 82   | 103  | 107        | 1        | 1              | 0            | 0              | 1                     | 31          | 7.60        | 0    |
| 565  | 2   | 10  | 143    | 35     | 17.12 | 87        | 94         | 53         | 94  | 85  | 93  | 104  | 74   | 95  | 92  | 98  | 105  | 67   | 94  | 100 | 95  | 107  | 71   | 94   | 100        | 0        | 0              | 0            | 0              | 0                     | 13          | 8.70        | 0    |
| 568  | 2   | 10  | 130    | 29     | 17.16 | 83        | 83         | 50         | 102 | 105 | 104 | 94   | 69   | 102 | 98  | 99  | 104  | 67   | 110 | 96  | 107 | 99   | 63   | 110  | 110        | 1        | 0              | 0            | 0              | 1                     | 27          | 8.30        | 0    |
| 569  | 2   | 10  | 135    | 26     | 14.27 | 114       | 119        | 56         | 135 | 124 | 121 | 109  | 75   | 132 | 129 | 130 | 124  | 78   | 134 | 128 | 130 | 127  | 74   | 134  | 135        | 1        | 0              | 0            | 0              | 0                     | 21          | 11.40       | 0    |
| 571  | 1   | 11  | 137    | 33     | 17.58 | 88        | 115        | 63         | 105 | 105 | 105 | 129  | 97   | 108 | 100 | 108 | 131  | 83   | 109 | 110 | 112 | 125  | 87   | 106  | 112        | 0        | 0              | 0            | 0              | 0                     | 24          | 8.80        | 0    |
| 572  | 2   | 9   | 131    | 25     | 14.57 | 87        | 104        | 55         | 110 | 99  | 93  | 112  | 72   | 107 | 92  | 100 | 109  | 65   | 104 | 91  | 101 | 110  | 74   | 105  | 110        | 1        | 0              | 0            | 0              | 0                     | 23          | 8.70        | 0    |
| 573  | 1   | 11  | 157    | 45     | 18.26 | 77        | 112        | 66         | 86  | 88  | 90  | 112  | 69   | 90  | 95  | 96  | 119  | 71   | 100 | 93  | 96  | 112  | 75   | 104  | 104        | 0        | 0              | 0            | 0              | 0                     | 27          | 7.70        | 0    |
| 574  | 1   | 11  | 154    | 40     | 16.87 | 70        | 95         | 51         | 88  | 87  | 85  | 105  | 57   | 88  | 89  | 88  | 105  | 50   | 91  | 91  | 92  | 99   | 53   | 85   | 91         | 1        | 0              | 0            | 0              | 1                     | 21          | 7.00        | 0    |
| 575  | 1   | 11  | 141    | 32     | 16.10 | 87        | 111        | 73         | 99  | 101 | 108 | 121  | 85   | 106 | 103 | 102 | 124  | 89   | 107 | 111 | 109 | 128  | 87   | 114  | 114        | 0        | 0              | 0            | 0              | 1                     | 27          | 8.70        | 0    |
| 576  | 1   | 13  | 152    | 42     | 18.18 | 66        | 109        | 62         | 76  | 80  | 80  | 111  | 74   | 90  | 82  | 79  |      |      |     |     |     |      |      |      |            |          |                |              |                |                       |             |             |      |

# Test group

| code | sex | age | height | weight | BMI   | supine HR | supine SBP | supine DBP | HR1 | HR2 | HR3 | SBP3 | DBP3 | HR4 | HR5 | HR6 | SBP6 | DBP6 | HR7 | HR8 | HR9 | SBP9 | DBP9 | HR10 | highest HR | car sick | family history | water intake | sleeping hours | school-induced burden | HR increase | supine HR10 | POTS |   |
|------|-----|-----|--------|--------|-------|-----------|------------|------------|-----|-----|-----|------|------|-----|-----|-----|------|------|-----|-----|-----|------|------|------|------------|----------|----------------|--------------|----------------|-----------------------|-------------|-------------|------|---|
| 589  | 2   | 10  | 148    | 36     | 16.44 | 93        | 93         | 60         | 117 | 122 | 116 | 108  | 71   | 123 | 121 | 111 | 114  | 74   | 121 | 119 | 113 | 113  | 53   | 119  | 123        | 0        | 1              | 0            | 0              | 0                     | 1           | 30          | 9.30 | 0 |
| 591  | 1   | 10  | 151    | 41     | 17.98 | 80        | 112        | 58         | 102 | 94  | 103 | 120  | 75   | 104 | 107 | 98  | 120  | 75   | 108 | 106 | 110 | 119  | 64   | 119  | 119        | 0        | 0              | 0            | 0              | 0                     | 0           | 39          | 8.00 | 0 |
| 593  | 2   | 11  | 155    | 45     | 18.73 | 72        | 96         | 51         | 78  | 77  | 78  | 97   | 56   | 76  | 77  | 82  | 97   | 57   | 78  | 76  | 79  | 96   | 53   | 78   | 82         | 1        | 1              | 0            | 1              | 1                     | 10          | 7.20        | 0    |   |
| 594  | 2   | 11  | 155    | 47     | 19.56 | 73        | 115        | 69         | 95  | 94  | 92  | 132  | 72   | 90  | 95  | 93  | 119  | 86   | 91  | 93  | 91  | 127  | 79   | 97   | 97         | 1        | 1              | 0            | 0              | 0                     | 1           | 24          | 7.30 | 0 |
| 595  | 2   | 12  | 162    | 55     | 20.96 | 69        | 120        | 67         | 83  | 89  | 81  | 113  | 79   | 83  | 86  | 83  | 117  | 66   | 89  | 84  | 82  | 117  | 78   | 77   | 89         | 0        | 0              | 0            | 0              | 0                     | 0           | 20          | 6.90 | 0 |
| 596  | 1   | 10  | 136    | 40     | 21.63 | 81        | 126        | 59         | 102 | 105 | 108 | 114  | 65   | 102 | 108 | 103 | 106  | 65   | 105 | 101 | 104 | 111  | 64   | 108  | 108        | 0        | 0              | 0            | 0              | 0                     | 0           | 27          | 8.10 | 0 |
| 597  | 1   | 11  | 150    | 43     | 19.11 | 77        | 131        | 44         | 98  | 87  | 93  | 124  | 68   | 88  | 87  | 89  | 137  | 55   | 102 | 100 | 96  | 132  | 48   | 100  | 102        | 0        | 0              | 0            | 0              | 0                     | 1           | 25          | 7.70 | 0 |
| 599  | 1   | 11  | 168    | 65     | 23.03 | 93        | 114        | 60         | 126 | 116 | 111 | 112  | 72   | 113 | 119 | 119 | 117  | 75   | 121 | 125 | 115 | 97   | 67   | 112  | 126        | 1        | 0              | 0            | 1              | 1                     | 33          | 9.30        | 1    |   |
| 604  | 1   | 10  | 143    | 37     | 18.09 | 86        | 101        | 59         | 104 | 104 | 103 | 107  | 77   | 106 | 105 | 113 | 101  | 63   | 113 | 104 | 102 | 110  | 72   | 112  | 113        | 1        | 0              | 0            | 0              | 1                     | 27          | 8.60        | 0    |   |
| 606  | 1   | 10  | 144    | 31     | 14.95 | 70        | 105        | 65         | 81  | 75  | 71  | 117  | 76   | 76  | 74  | 71  | 117  | 71   | 67  | 66  | 72  | 115  | 77   | 73   | 81         | 0        | 0              | 0            | 0              | 0                     | 1           | 11          | 7.00 | 0 |
| 607  | 1   | 11  | 153    | 57     | 24.35 | 83        | 125        | 83         | 110 | 98  | 99  | 134  | 95   | 105 | 103 | 93  | 128  | 96   | 97  | 105 | 113 | 132  | 95   | 108  | 113        | 1        | 0              | 0            | 0              | 1                     | 30          | 8.30        | 0    |   |
| 608  | 2   | 10  | 154    | 31     | 13.07 | 88        | 114        | 73         | 104 | 101 | 109 | 127  | 86   | 114 | 104 | 107 | 124  | 90   | 109 | 101 | 110 | 126  | 85   | 112  | 114        | 1        | 0              | 0            | 0              | 1                     | 26          | 8.80        | 0    |   |
| 610  | 1   | 10  | 148    | 47     | 21.46 | 104       | 135        | 51         | 117 | 110 | 116 | 121  | 67   | 113 | 119 | 120 | 121  | 64   | 116 | 118 | 120 | 109  | 54   | 117  | 120        | 0        | 0              | 1            | 0              | 1                     | 16          | 10.40       | 1    |   |
| 611  | 1   | 11  | 148    | 43     | 19.63 | 79        | 113        | 64         | 106 | 101 | 103 | 107  | 73   | 108 | 111 | 105 | 106  | 72   | 110 | 107 | 107 | 109  | 65   | 110  | 111        | 1        | 0              | 0            | 0              | 1                     | 32          | 7.90        | 0    |   |
| 614  | 1   | 11  | 153    | 36     | 15.38 | 84        | 100        | 74         | 110 | 114 | 117 | 111  | 72   | 114 | 113 | 117 | 102  | 68   | 115 | 113 | 115 | 117  | 78   | 112  | 117        | 0        | 0              | 0            | 1              | 1                     | 33          | 8.40        | 0    |   |
| 615  | 2   | 10  | 142    | 31     | 15.37 | 79        | 100        | 63         | 94  | 97  | 96  | 120  | 57   | 98  | 101 | 102 | 108  | 59   | 100 | 99  | 95  | 104  | 64   | 103  | 103        | 1        | 0              | 0            | 0              | 0                     | 1           | 24          | 7.90 | 0 |
| 616  | 2   | 10  | 149    | 47     | 21.17 | 80        | 118        | 73         | 108 | 106 | 97  | 136  | 91   | 105 | 117 | 111 | 131  | 83   | 112 | 115 | 108 | 129  | 87   | 109  | 117        | 1        | 0              | 0            | 0              | 1                     | 37          | 8.00        | 0    |   |
| 617  | 1   | 12  | 164    | 50     | 18.59 | 79        | 117        | 96         | 98  | 102 | 106 | 121  | 69   | 100 | 104 | 106 | 138  | 62   | 107 |     |     | 105  | 55   |      | 107        | 1        | 0              | 0            | 1              | 0                     | 28          | 7.90        | 0    |   |
| 618  | 2   | 11  | 151    | 52     | 22.81 | 91        | 136        | 73         | 111 | 110 | 105 | 141  | 76   | 100 | 107 | 114 | 150  | 78   | 109 | 104 | 111 | 118  | 76   | 106  | 111        | 1        | 0              | 0            | 0              | 1                     | 20          | 9.10        | 0    |   |
| 619  | 2   | 11  | 156    | 46     | 18.90 | 74        | 102        | 60         | 94  | 92  | 90  | 117  | 68   | 101 | 94  | 95  | 107  | 64   | 89  | 100 | 89  | 109  | 67   | 88   | 101        | 1        | 0              | 0            | 0              | 1                     | 27          | 7.40        | 0    |   |
| 620  | 1   | 12  | 156    | 60     | 24.65 | 85        | 122        | 51         | 110 | 102 | 97  | 117  | 73   | 106 | 107 | 100 | 130  | 69   | 109 | 106 | 108 | 74   | 56   | 107  | 110        | 0        | 0              | 0            | 0              | 0                     | 25          | 8.50        | 0    |   |
| 621  | 2   | 12  | 153    | 47     | 20.08 | 80        | 108        | 64         | 107 | 118 | 111 | 114  | 78   | 122 | 118 | 114 | 113  | 72   | 115 | 113 | 120 | 115  | 70   | 106  | 122        | 1        | 0              | 0            | 1              | 1                     | 42          | 8.00        | 1    |   |
| 623  | 1   | 11  | 151    | 39     | 17.10 | 83        | 131        | 85         | 103 | 95  | 101 | 127  | 78   | 98  | 100 | 98  | 117  | 82   | 103 | 106 | 104 | 119  | 80   | 111  | 111        | 0        | 0              | 0            | 0              | 0                     | 28          | 8.30        | 0    |   |
| 624  | 2   | 10  | 155    | 46     | 19.15 | 107       | 114        | 77         | 124 | 106 | 110 | 122  | 90   | 109 | 120 | 114 | 116  | 84   | 107 | 116 | 118 | 120  | 85   | 111  | 124        | 1        | 0              | 0            | 1              | 1                     | 17          | 10.70       | 1    |   |
| 625  | 2   | 10  | 136    | 28     | 15.14 | 110       | 123        | 77         | 122 | 115 | 116 | 134  | 91   | 113 | 119 | 122 | 130  | 87   | 122 | 123 | 123 | 125  | 85   | 118  | 123        | 0        | 0              | 0            | 0              | 0                     | 13          | 11.00       | 0    |   |
| 627  | 1   | 11  | 150    | 40     | 17.78 | 85        | 105        | 74         | 102 | 112 | 109 | 109  | 80   | 103 | 109 | 116 | 116  | 73   | 109 | 100 | 114 | 110  | 79   | 109  | 116        | 0        | 0              | 0            | 0              | 1                     | 31          | 8.50        | 0    |   |
| 628  | 2   | 10  | 154    | 40     | 16.87 | 106       | 115        | 77         | 121 | 113 | 110 | 116  | 77   | 112 | 108 | 109 | 117  | 74   | 115 | 116 | 114 | 114  | 80   | 118  | 121        | 0        | 0              | 0            | 0              | 1                     | 15          | 10.60       | 0    |   |
| 630  | 2   | 11  | 160    | 56     | 21.88 | 76        | 123        | 61         | 101 | 87  | 92  | 125  | 69   | 96  | 93  | 90  | 126  | 58   | 98  | 94  | 93  | 130  | 69   | 90   | 101        | 1        | 0              | 0            | 0              | 1                     | 25          | 7.60        | 0    |   |
| 704  | 2   | 12  | 153    | 44     | 18.80 | 73        | 98         | 56         | 90  | 85  | 83  | 117  | 80   | 89  | 93  | 93  | 116  | 74   | 95  | 84  | 92  | 115  | 77   | 88   | 95         | 0        | 1              | 0            | 0              | 0                     | 22          | 7.30        | 0    |   |
| 705  | 1   | 12  | 143    | 32     | 15.65 | 71        | 91         | 55         | 74  | 79  | 77  | 101  | 65   | 79  | 86  | 77  | 98   | 65   | 75  | 81  | 95  | 104  | 73   | 74   | 95         | 1        | 0              | 0            | 0              | 1                     | 24          | 7.10        | 0    |   |
| 722  | 2   | 9   | 145    | 32     | 15.22 | 84        | 98         | 54         | 96  | 92  | 95  | 102  | 72   | 92  | 92  | 96  | 108  | 73   | 102 | 96  | 94  | 105  | 66   | 98   | 102        | 1        | 0              | 0            | 0              | 0                     | 18          | 8.40        | 0    |   |
| 728  | 2   | 13  | 156    | 48     | 19.72 | 74        | 112        | 68         | 96  | 101 | 93  | 123  | 70   | 101 | 102 | 104 | 123  | 77   | 101 | 102 | 101 | 115  | 68   | 100  | 104        | 1        | 0              | 0            | 0              | 0                     | 30          | 7.40        | 0    |   |
| 730  | 2   | 9   | 130    | 30     | 17.75 | 84        | 101        | 58         | 87  | 94  | 96  | 102  | 76   | 103 | 108 | 93  | 100  | 70   | 101 | 99  | 104 | 96   | 58   | 102  | 108        | 0        | 0              | 0            | 0              | 0                     | 24          | 8.40        | 0    |   |
| 731  | 2   | 9   | 144    | 42     | 20.25 | 87        | 115        | 63         | 102 | 96  | 103 | 126  | 80   | 96  | 101 | 104 | 121  | 73   | 103 | 103 | 103 | 115  | 76   | 103  | 104        | 0        | 0              | 0            | 0              | 1                     | 17          | 8.70        | 0    |   |
| 746  | 2   | 14  | 156    | 52     | 21.37 | 110       | 112        | 61         | 118 | 118 | 117 | 116  | 71   | 124 | 122 | 119 | 114  | 74   | 128 | 127 | 127 | 111  | 75   | 124  | 128        | 0        | 0              | 0            | 0              | 1                     | 18          | 11.00       | 0    |   |
| 754  | 2   | 12  | 147    | 35     | 16.20 | 83        | 89         | 47         | 106 | 105 | 99  | 111  | 76   | 97  | 109 | 107 | 10   | 9    | 98  | 107 | 106 | 107  | 6    | 105  | 109        | 1        | 1              | 0            | 1              | 1                     | 26          | 8.30        | 0    |   |
| 782  | 1   | 9   | 144    | 39     | 18.81 | 102       | 108        | 64         | 117 | 105 | 116 | 120  | 82   | 112 | 115 | 111 | 121  | 76   | 115 | 116 | 110 | 124  | 77   | 105  | 117        | 1        | 0              | 0            | 0              | 0                     | 15          | 10.20       | 0    |   |
| 785  | 1   | 9   | 133    | 29     | 16.39 | 90        | 101        | 61         | 105 | 99  | 91  | 99   | 73   | 111 | 101 | 107 | 113  | 69   | 104 | 106 | 102 | 106  | 57   | 95   | 107        | 1        | 1              | 0            | 0              | 0                     | 17          | 9.00        | 0    |   |
| 807  | 1   | 8   | 130    | 24     | 14.20 | 75        | 91         | 56         | 103 | 97  | 94  | 103  | 75   | 102 | 95  | 90  | 112  | 80   | 101 | 93  | 91  | 107  | 77   | 96   | 103        | 1        | 0              | 0            | 0              | 1                     | 28          | 7.50        | 0    |   |
| 816  | 1   | 11  | 146    | 30     | 14.07 | 96        | 111        | 72         | 118 | 110 | 110 | 120  | 88   | 108 | 105 | 105 | 122  | 85   | 106 | 106 | 107 | 120  | 83   | 108  | 118        | 0        | 0              | 0            | 0              | 1                     | 22          | 9.60        | 0    |   |
| 820  | 2   | 11  | 138    | 30     | 15.75 | 80        | 118        | 62         | 90  | 96  | 91  | 127  | 77   | 100 | 101 | 104 | 117  | 75   | 97  | 102 | 102 | 121  | 73   | 97   | 104        | 0        | 0              | 0            | 0              | 1                     | 24          | 8.00        | 0    |   |
| 823  | 1   | 11  | 138    | 32     | 16.80 | 78        | 101        | 62         | 83  | 96  | 103 | 113  | 81   | 95  | 97  | 99  | 110  | 81   | 96  | 95  | 96  | 122  | 94   | 94   | 103        | 1        | 0              | 0            | 1              | 0                     | 25          | 7.80        | 0    |   |
| 832  | 1   | 8   | 145    | 27     | 12.84 | 76        | 107        | 57         | 112 | 110 | 107 | 110  | 63   | 113 | 110 | 107 | 103  | 65   | 108 | 115 | 103 | 110  | 70   | 110  | 115        | 1        | 0              | 0            | 0              | 0                     | 39          | 7.60        | 0    |   |
| 835  | 1   | 8   | 152    | 50     | 21.64 | 88        | 115        | 68         | 117 | 102 | 98  | 120  | 82   | 104 | 101 | 102 | 124  | 81   | 112 | 111 | 108 | 118  | 65   | 110  | 117        | 0        | 0              | 0            | 0              | 0                     | 29          | 8.80        | 0    |   |
| 838  | 1   | 8   | 145    | 26     | 12.37 | 94        | 104        | 66         | 116 | 106 | 100 | 109  | 81   | 111 | 110 | 108 | 108  | 80   | 107 | 110 | 101 | 111  | 82   | 108  | 116        | 0        | 0              | 0            | 0              | 0                     | 22          | 9.40        | 0    |   |
| 843  | 1   | 11  | 146    | 48     | 22.52 | 91        | 114        | 70         | 110 | 104 | 108 | 129  | 85   | 108 | 105 | 106 | 122  | 79   | 106 | 104 | 106 | 124  | 82   | 110  | 110        | 0        | 0              | 0            | 0              | 0                     | 19          | 9.10        | 0    |   |
| 850  | 2   | 11  | 141    | 35     | 17.60 | 101       | 102        | 57         | 117 | 111 | 113 | 107  | 65   | 115 | 113 | 114 | 111  | 67   | 117 | 119 | 113 | 107  | 64   | 117  | 119        | 1        | 0              | 0            | 0              | 1                     | 18          | 10.10       | 0    |   |
| 856  | 1   |     |        |        |       |           |            |            |     |     |     |      |      |     |     |     |      |      |     |     |     |      |      |      |            |          |                |              |                |                       |             |             |      |   |

# Test group

| code | sex | age | height | weight | BMI   | supine HR | supine SBP | supine DBP | HR1 | HR2 | HR3 | SBP3 | DBP3 | HR4 | HR5 | HR6 | SBP6 | DBP6 | HR7 | HR8 | HR9 | SBP9 | DBP9 | HR10 | highest HR | car sick | family history | water intake | sleeping hours | school-induced burden | HR increase | supine HR10 | POTS |   |
|------|-----|-----|--------|--------|-------|-----------|------------|------------|-----|-----|-----|------|------|-----|-----|-----|------|------|-----|-----|-----|------|------|------|------------|----------|----------------|--------------|----------------|-----------------------|-------------|-------------|------|---|
| 887  | 1   | 8   | 124    | 26     | 16.91 | 96        | 109        | 73         | 104 | 107 | 107 | 123  | 91   | 104 | 106 | 108 | 116  | 82   | 106 | 109 | 108 | 122  | 86   | 106  | 109        | 0        | 0              | 0            | 0              | 0                     | 1           | 13          | 9.60 | 0 |
| 892  | 1   | 8   | 134    | 27     | 15.04 | 83        | 111        | 74         | 90  | 94  | 88  | 121  | 88   | 85  | 89  | 94  | 117  | 84   | 99  | 90  | 92  | 112  | 84   | 93   | 99         | 0        | 0              | 0            | 0              | 0                     | 1           | 16          | 8.30 | 0 |
| 894  | 2   | 8   | 120    | 22     | 15.28 | 110       | 92         | 50         | 126 | 120 | 121 | 102  | 62   | 126 | 125 | 123 | 100  | 65   | 118 | 126 | 119 | 102  | 63   | 126  | 126        | 1        | 1              | 1            | 0              | 1                     | 16          | 11.00       | 0    |   |
| 901  | 1   | 8   | 132    | 29     | 16.64 | 81        | 89         | 56         | 102 | 103 | 94  | 96   | 69   | 96  | 96  | 100 | 93   | 67   | 101 | 110 | 98  | 95   | 66   | 100  | 110        | 1        | 0              | 0            | 0              | 0                     | 1           | 29          | 8.10 | 0 |
| 906  | 1   | 8   | 125    | 28     | 17.92 | 97        | 106        | 58         | 113 | 113 | 110 | 114  | 72   | 110 | 115 | 120 | 109  | 68   | 115 | 118 | 120 | 109  | 74   | 122  | 122        | 1        | 0              | 1            | 1              | 0                     | 25          | 9.70        | 0    |   |
| 907  | 2   | 8   | 125    | 24     | 15.36 | 95        | 95         | 63         | 110 | 111 | 106 | 103  | 60   | 108 | 110 | 111 | 101  | 65   | 110 | 109 | 109 | 108  | 69   | 111  | 111        | 0        | 1              | 0            | 0              | 0                     | 0           | 16          | 9.50 | 0 |
| 915  | 1   | 12  | 153    | 50     | 21.36 | 90        | 105        | 63         | 117 | 116 | 111 | 114  | 75   | 117 | 112 | 118 | 113  | 74   | 120 | 116 | 118 | 113  | 76   | 120  | 120        | 1        | 0              | 0            | 0              | 0                     | 30          | 9.00        | 0    |   |
| 919  | 1   | 8   | 150    | 40     | 17.78 | 83        | 100        | 66         | 108 | 108 | 110 | 113  | 74   | 115 | 114 | 122 | 114  | 78   | 120 | 118 | 117 | 116  | 79   | 124  | 124        | 1        | 0              | 1            | 0              | 0                     | 41          | 8.30        | 1    |   |
| 922  | 1   | 9   | 137    | 26     | 13.85 | 94        | 97         | 65         | 124 | 108 | 115 | 111  | 77   | 116 | 120 | 119 | 110  | 87   | 113 | 123 | 120 | 96   | 60   | 120  | 124        | 0        | 0              | 1            | 1              | 0                     | 30          | 9.40        | 1    |   |
| 924  | 1   | 8   | 120    | 22     | 15.28 | 111       | 99         | 58         | 144 | 133 | 129 | 112  | 79   | 129 | 129 | 131 | 107  | 76   | 121 | 127 | 128 | 107  | 73   | 132  | 144        | 0        | 0              | 0            | 0              | 1                     | 33          | 11.10       | 0    |   |
| 925  | 2   | 8   | 129    | 25     | 15.02 | 82        | 106        | 75         | 106 | 104 | 102 | 114  | 79   | 102 | 108 | 98  | 115  | 84   | 106 | 107 | 107 | 104  | 74   | 105  | 108        | 0        | 0              | 0            | 0              | 0                     | 26          | 8.20        | 0    |   |
| 926  | 2   | 8   | 125    | 23     | 14.72 | 70        | 110        | 59         | 80  | 93  | 82  | 115  | 75   | 91  | 85  | 86  | 111  | 78   | 90  | 89  | 91  | 107  | 72   | 86   | 93         | 1        | 0              | 0            | 0              | 1                     | 23          | 7.00        | 0    |   |
| 930  | 1   | 7   | 125    | 25     | 16.00 | 121       | 115        | 67         | 128 | 126 | 128 | 123  | 83   | 126 | 128 | 133 | 116  | 80   | 129 | 131 | 129 | 122  | 71   | 127  | 133        | 0        | 0              | 1            | 1              | 0                     | 12          | 12.10       | 0    |   |
| 931  | 2   | 8   | 132    | 30     | 17.22 | 80        | 114        | 64         | 108 | 100 | 105 | 121  | 75   | 110 | 107 | 103 | 120  | 70   | 110 | 110 | 108 | 153  | 131  | 102  | 110        | 0        | 0              | 1            | 1              | 0                     | 30          | 8.00        | 0    |   |
| 932  | 1   | 12  | 134    | 27     | 15.04 | 85        | 86         | 62         | 103 | 101 | 101 | 109  | 82   | 111 | 105 | 108 | 107  | 80   | 108 | 103 | 108 | 107  | 78   | 105  | 111        | 1        | 0              | 0            | 1              | 0                     | 26          | 8.50        | 0    |   |
| 933  | 1   | 8   | 134    | 28     | 15.59 | 70        | 96         | 50         | 74  | 83  | 83  | 105  | 66   | 76  | 97  | 93  | 103  | 73   | 85  | 90  | 91  | 105  | 68   | 85   | 97         | 0        | 0              | 0            | 0              | 0                     | 27          | 7.00        | 0    |   |
| 934  | 2   | 9   | 122    | 22     | 14.78 | 96        | 111        | 64         | 105 | 110 | 104 | 119  | 67   | 102 | 105 | 107 | 120  | 75   | 103 | 103 | 108 | 112  | 72   | 103  | 110        | 0        | 0              | 0            | 0              | 0                     | 14          | 9.60        | 0    |   |
| 935  | 1   | 8   | 125    | 25     | 16.00 | 80        | 99         | 58         | 99  | 108 | 102 | 99   | 71   | 94  | 95  | 100 | 97   | 69   | 101 | 98  | 104 | 105  | 71   | 101  | 108        | 0        | 0              | 0            | 1              | 28                    | 8.00        | 0           |      |   |
| 937  | 1   | 8   | 125    | 27     | 17.28 | 86        | 99         | 62         | 101 | 86  | 90  | 114  | 76   | 91  | 94  | 97  | 113  | 77   | 99  | 95  | 99  | 112  | 80   | 90   | 101        | 1        | 0              | 0            | 0              | 1                     | 15          | 8.60        | 0    |   |
| 938  | 1   | 9   | 121    | 22     | 15.03 | 98        | 105        | 65         | 128 | 122 | 114 | 110  | 72   | 125 | 131 | 131 | 109  | 75   | 130 | 125 | 128 | 104  | 76   | 127  | 131        | 1        | 0              | 0            | 0              | 1                     | 33          | 9.80        | 0    |   |
| 941  | 1   | 8   | 125    | 25     | 16.00 | 71        | 84         | 46         | 100 | 92  | 89  | 89   | 70   | 97  | 101 | 92  | 104  | 74   | 97  | 96  | 88  | 91   | 59   | 102  | 102        | 0        | 0              | 0            | 0              | 1                     | 31          | 7.10        | 0    |   |
| 943  | 2   | 8   | 125    | 27     | 17.28 | 84        | 81         | 45         | 89  | 99  | 98  | 102  | 50   | 94  | 99  | 97  | 103  | 67   | 95  | 96  | 99  | 111  | 60   | 97   | 99         | 1        | 0              | 0            | 0              | 1                     | 15          | 8.40        | 0    |   |
| 945  | 1   | 11  | 142    | 30     | 14.88 | 95        | 113        | 66         | 116 | 111 | 109 | 125  | 79   | 114 | 116 | 114 | 124  | 84   | 114 | 112 | 113 | 129  | 83   | 112  | 116        | 1        | 0              | 1            | 0              | 1                     | 21          | 9.50        | 0    |   |
| 954  | 1   | 9   | 140    | 40     | 20.41 | 90        | 109        | 54         | 102 | 109 | 103 | 113  | 71   | 104 | 103 | 115 | 117  | 76   | 106 | 102 | 102 | 118  | 70   | 106  | 115        | 1        | 0              | 0            | 0              | 0                     | 25          | 9.00        | 0    |   |
| 955  | 1   | 9   | 132    | 30     | 17.22 | 98        | 106        | 66         | 117 | 110 | 116 | 114  | 77   | 119 | 114 | 115 | 114  | 78   | 116 | 115 | 117 | 116  | 78   | 119  | 119        | 1        | 1              | 0            | 1              | 1                     | 21          | 9.80        | 0    |   |
| 956  | 1   | 10  | 142    | 37     | 18.35 | 97        | 102        | 42         | 108 | 110 | 108 | 114  | 52   | 106 | 105 | 108 | 106  | 77   | 111 | 109 | 108 | 110  | 63   | 111  | 111        | 0        | 0              | 1            | 0              | 1                     | 14          | 9.70        | 0    |   |
| 957  | 1   | 9   | 132    | 28     | 16.07 | 80        | 107        | 65         | 99  | 108 | 102 | 119  | 77   | 102 | 103 | 103 | 117  | 73   | 107 | 105 | 108 | 113  | 67   | 108  | 108        | 0        | 0              | 0            | 0              | 1                     | 28          | 8.00        | 0    |   |
| 959  | 1   | 9   | 134    | 30     | 16.71 | 104       | 108        | 75         | 134 | 138 | 142 | 115  | 82   | 134 | 144 | 138 | 122  | 87   | 140 | 142 | 140 | 132  | 89   | 141  | 144        | 0        | 0              | 0            | 1              | 0                     | 40          | 10.40       | 1    |   |
| 960  | 2   | 8   | 123    | 23     | 15.20 | 96        | 92         | 54         | 111 | 110 | 113 | 105  | 70   | 110 | 117 | 110 | 108  | 62   | 117 | 114 | 114 | 103  | 66   | 113  | 117        | 1        | 0              | 0            | 0              | 0                     | 21          | 9.60        | 0    |   |
| 961  | 2   | 9   | 131    | 31     | 18.06 | 101       | 117        | 45         | 112 | 117 | 120 | 103  | 70   | 119 | 114 | 112 | 119  | 81   | 113 | 116 | 119 | 122  | 73   | 120  | 120        | 0        | 0              | 0            | 0              | 1                     | 19          | 10.10       | 0    |   |
| 962  | 1   | 8   | 132    | 25     | 14.35 | 110       | 111        | 70         | 133 | 121 | 127 | 113  | 75   | 126 | 130 | 127 | 121  | 68   | 129 | 127 | 129 | 118  | 68   | 126  | 133        | 0        | 1              | 0            | 0              | 0                     | 23          | 11.00       | 0    |   |
| 964  | 1   | 7   | 117    | 22     | 16.07 | 90        | 96         | 62         | 112 | 110 | 108 | 108  | 75   | 112 | 110 | 107 | 115  | 78   | 107 | 102 | 110 | 111  | 78   | 110  | 112        | 0        | 0              | 0            | 1              | 22                    | 9.00        | 0           |      |   |
| 965  | 1   | 8   | 135    | 30     | 16.46 | 102       | 104        | 56         | 112 | 120 | 121 | 119  | 75   | 115 | 119 | 117 | 116  | 72   | 126 | 122 | 122 | 115  | 77   | 118  | 126        | 1        | 0              | 0            | 0              | 1                     | 24          | 10.20       | 0    |   |
| 966  | 1   | 7   | 125    | 27     | 17.28 | 85        | 103        | 58         | 103 | 105 | 109 | 103  | 72   | 109 | 109 | 107 | 103  | 66   | 111 | 112 | 109 | 100  | 67   | 110  | 112        | 1        | 0              | 0            | 0              | 0                     | 1           | 27          | 8.50 | 0 |
| 967  | 1   | 10  | 155    | 45     | 18.73 | 84        | 101        | 61         | 107 | 102 | 105 | 116  | 85   | 111 | 104 | 112 | 125  | 83   | 103 | 110 | 106 | 115  | 81   | 112  | 112        | 1        | 0              | 0            | 0              | 1                     | 28          | 8.40        | 0    |   |
| 968  | 2   | 9   | 145    | 34     | 16.17 | 84        | 103        | 63         | 111 | 106 | 107 | 117  | 77   | 105 | 108 | 105 | 118  | 73   | 105 | 104 | 109 | 114  | 83   | 103  | 111        | 0        | 0              | 0            | 0              | 0                     | 27          | 8.40        | 0    |   |
| 969  | 1   | 7   | 134    | 27     | 15.04 | 83        | 96         | 60         | 105 | 107 | 97  | 105  | 59   | 105 | 105 | 103 | 111  | 71   | 101 | 108 | 108 | 108  | 64   | 106  | 108        | 1        | 0              | 0            | 0              | 0                     | 25          | 8.30        | 0    |   |
| 970  | 1   | 10  | 143    | 39     | 19.07 | 103       | 110        | 44         | 108 | 102 | 101 | 114  | 72   | 106 | 106 | 103 | 115  | 77   | 103 | 106 | 106 | 110  | 74   | 108  | 108        | 1        | 1              | 0            | 0              | 1                     | 5           | 10.30       | 0    |   |
| 971  | 2   | 10  | 144    | 39     | 18.81 | 83        | 105        | 73         | 98  | 99  | 107 | 113  | 76   | 105 | 106 | 99  | 117  | 74   | 107 | 107 | 111 | 120  | 81   | 108  | 111        | 1        | 0              | 0            | 0              | 1                     | 28          | 8.30        | 0    |   |
| 1001 | 2   | 7   | 136    | 30     | 16.22 | 87        | 120        | 47         | 106 | 104 | 114 | 117  | 65   | 114 | 116 | 111 | 138  | 71   | 112 | 113 | 104 | 121  | 66   | 114  | 116        | 1        | 0              | 0            | 1              | 1                     | 29          | 8.70        | 0    |   |
| 1002 | 1   | 10  | 131    | 25     | 14.57 | 81        | 115        | 67         | 107 | 104 | 108 | 126  | 80   | 109 | 117 | 116 | 136  | 88   | 112 | 119 | 116 | 132  | 86   | 119  | 119        | 1        | 0              | 0            | 0              | 1                     | 38          | 8.10        | 0    |   |
| 1003 | 2   | 7   | 133    | 39     | 22.05 | 84        | 111        | 61         | 101 | 105 | 102 | 116  | 76   | 106 | 101 | 108 | 115  | 70   | 109 | 109 | 103 | 114  | 72   | 107  | 109        | 0        | 0              | 0            | 0              | 1                     | 25          | 8.40        | 0    |   |
| 1004 | 1   | 7   | 140    | 30     | 15.31 | 92        | 103        | 68         | 126 | 105 | 104 | 110  | 80   | 109 | 116 | 112 | 111  | 76   | 119 | 117 | 116 | 110  | 71   | 107  | 126        | 0        | 0              | 1            | 1              | 0                     | 34          | 9.20        | 0    |   |
| 1006 | 2   | 7   | 136    | 29     | 15.68 | 82        | 98         | 59         | 108 | 95  | 100 | 105  | 69   | 95  | 104 | 100 | 105  | 76   | 106 | 105 | 106 | 109  | 74   | 106  | 108        | 0        | 0              | 0            | 0              | 1                     | 26          | 8.20        | 0    |   |
| 1007 | 2   | 7   | 135    | 29     | 15.91 | 92        | 98         | 54         | 118 | 103 | 110 | 104  | 70   | 108 | 114 | 112 | 105  | 67   | 118 | 112 | 110 | 104  | 60   | 111  | 118        | 0        | 1              | 0            | 0              | 0                     | 26          | 9.20        | 0    |   |
| 1008 | 1   | 7   | 125    | 27     | 17.28 | 76        | 95         | 54         | 104 | 94  | 92  | 105  | 69   | 97  | 92  | 89  | 105  | 73   | 87  | 95  | 86  | 106  | 70   | 98   | 104        | 1        | 0              | 0            | 0              | 0                     | 28          | 7.60        | 0    |   |
| 1009 | 1   | 8   | 135    | 29     | 15.91 | 80        | 113        | 62         | 107 | 91  | 105 | 119  | 79   | 107 | 104 | 102 | 120  | 79   | 104 | 103 | 105 | 125  | 81   | 103  | 107        | 0        | 0              | 0            | 0              | 1                     | 27          | 8.00        |      |   |



# Test group

| code | sex | age | height | weight | BMI   | supine HR | supine SBP | supine DBP | HR1 | HR2 | HR3 | SBP3 | DBP3 | HR4 | HR5 | HR6 | SBP6 | DBP6 | HR7 | HR8 | HR9 | SBP9 | DBP9 | HR10 | highest HR | car sick | family history | water intake | sleeping hours | school-induced burden | HR increase | supine HR10 | POTS |
|------|-----|-----|--------|--------|-------|-----------|------------|------------|-----|-----|-----|------|------|-----|-----|-----|------|------|-----|-----|-----|------|------|------|------------|----------|----------------|--------------|----------------|-----------------------|-------------|-------------|------|
| 1022 | 1   | 7   | 142    | 33     | 16.37 | 89        | 99         | 65         | 117 | 107 | 108 | 108  | 79   | 114 | 114 | 106 | 104  | 72   | 104 | 118 | 119 | 106  | 75   | 113  | 119        | 1        | 1              | 0            | 1              | 1                     | 30          | 8.90        | 0    |
| 1023 | 1   | 10  | 152    | 55     | 23.81 | 80        | 118        | 66         | 93  | 94  | 95  | 127  | 86   | 90  | 95  | 93  | 129  | 80   | 97  | 95  | 100 | 132  | 78   | 95   | 100        | 0        | 0              | 0            | 0              | 0                     | 20          | 8.00        | 0    |
| 1024 | 2   | 8   | 134    | 25     | 13.92 | 80        | 98         | 58         | 99  | 98  | 96  | 103  | 71   | 97  | 89  | 91  | 108  | 78   | 86  | 91  | 90  | 116  | 79   | 90   | 99         | 1        | 0              | 0            | 0              | 0                     | 19          | 8.00        | 0    |
| 1025 | 2   | 9   | 147    | 78     | 36.10 | 82        | 115        | 68         | 97  | 92  | 98  | 111  | 81   | 91  | 94  | 91  | 108  | 77   | 102 | 101 | 93  | 117  | 78   | 100  | 102        | 1        | 0              | 0            | 1              | 0                     | 20          | 8.20        | 0    |
| 1027 | 1   | 10  | 150    | 37     | 16.44 | 95        | 98         | 63         | 117 | 110 | 108 | 112  | 65   | 114 | 118 | 106 | 110  | 67   | 111 | 108 | 118 | 110  | 68   | 116  | 118        | 1        | 1              | 0            | 0              | 1                     | 23          | 9.50        | 0    |
| 1029 | 1   | 9   | 136    | 27     | 14.60 | 78        | 107        | 53         | 88  | 79  | 89  | 123  | 66   | 87  | 96  | 93  | 113  | 80   | 88  | 92  | 92  | 112  | 71   | 87   | 96         | 1        | 0              | 0            | 0              | 0                     | 18          | 7.80        | 0    |
| 1030 | 2   | 9   | 135    | 27     | 14.81 | 85        | 101        | 56         | 108 | 107 | 100 | 110  | 74   | 100 | 105 | 109 | 108  | 76   | 103 | 106 | 105 | 107  | 69   | 101  | 109        | 0        | 0              | 0            | 0              | 1                     | 24          | 8.50        | 0    |
| 1032 | 2   | 10  | 134    | 26     | 14.48 | 74        | 109        | 74         | 113 | 98  | 102 | 120  | 91   | 102 | 98  | 103 | 116  | 82   | 110 | 102 | 112 | 115  | 82   | 103  | 113        | 0        | 0              | 0            | 0              | 0                     | 39          | 7.40        | 0    |
| 1034 | 2   | 9   | 135    | 26     | 14.27 | 81        | 94         | 60         | 96  | 98  | 92  | 107  | 62   | 88  | 94  | 96  | 103  | 69   | 94  | 99  | 100 | 98   | 70   | 101  | 101        | 0        | 1              | 0            | 0              | 0                     | 20          | 8.10        | 0    |
| 1035 | 1   | 9   | 135    | 35     | 19.20 | 98        | 109        | 70         | 106 | 117 | 109 | 115  | 80   | 119 | 117 | 122 | 113  | 70   | 117 | 109 | 125 | 121  | 83   | 124  | 125        | 0        | 0              | 1            | 0              | 0                     | 27          | 9.80        | 1    |
| 1037 | 1   | 9   | 135    | 28     | 15.36 | 72        | 112        | 65         | 96  | 87  | 89  | 121  | 86   | 87  | 83  | 89  | 107  | 81   | 91  | 82  | 90  | 120  | 77   | 87   | 96         | 0        | 0              | 0            | 0              | 0                     | 24          | 7.20        | 0    |
| 1038 | 1   | 9   | 132    | 26     | 14.92 | 94        | 105        | 71         | 106 | 108 | 103 | 119  | 79   | 106 | 108 | 105 | 115  | 64   | 107 | 98  | 98  | 118  | 74   | 103  | 108        | 0        | 0              | 0            | 0              | 1                     | 14          | 9.40        | 0    |
| 1040 | 2   | 9   | 155    | 44     | 18.31 | 90        | 130        | 78         | 119 | 122 | 123 | 142  | 97   | 125 | 125 | 124 | 135  | 93   | 124 | 128 | 120 | 134  | 91   | 124  | 128        | 1        | 0              | 0            | 0              | 1                     | 38          | 9.00        | 0    |
| 1041 | 2   | 11  | 140    | 31     | 15.82 | 102       | 123        | 69         | 105 | 108 | 105 | 131  | 84   | 108 | 111 | 117 | 124  | 80   | 113 | 115 | 123 | 133  | 81   | 120  | 123        | 1        | 0              | 0            | 0              | 1                     | 21          | 10.20       | 0    |
| 1042 | 2   | 9   | 133    | 27     | 15.26 | 82        | 99         | 47         | 85  | 96  | 90  | 97   | 70   | 89  | 95  | 92  | 105  | 63   | 93  | 92  | 87  | 105  | 66   | 90   | 96         | 0        | 0              | 0            | 1              | 1                     | 14          | 8.20        | 0    |
| 1045 | 1   | 9   | 140    | 37     | 18.88 | 99        | 112        | 55         | 123 | 128 | 124 | 114  | 72   | 125 | 127 | 123 | 59   | 36   | 117 | 126 | 124 | 101  | 61   | 123  | 127        | 1        | 0              | 0            | 0              | 0                     | 28          | 9.90        | 0    |
| 1046 | 1   | 9   | 140    | 37     | 18.88 | 80        | 101        | 61         | 93  | 90  | 91  | 104  | 76   | 93  | 89  | 92  | 106  | 79   | 96  | 97  | 93  | 109  | 72   | 94   | 97         | 0        | 0              | 0            | 0              | 0                     | 17          | 8.00        | 0    |
| 1047 | 2   | 10  | 137    | 30     | 15.98 | 100       | 100        | 54         | 106 | 104 | 107 | 110  | 71   | 111 | 114 | 111 | 110  | 68   | 107 | 108 | 110 | 107  | 68   | 113  | 114        | 0        | 0              | 0            | 1              | 1                     | 14          | 10.00       | 0    |
| 1048 | 2   | 9   | 136    | 42     | 22.71 | 95        | 106        | 60         | 116 | 116 | 112 | 117  | 67   | 113 | 115 | 118 | 123  | 56   | 114 | 124 | 116 | 125  | 66   | 108  | 124        | 0        | 0              | 0            | 0              | 0                     | 29          | 9.50        | 0    |
| 1049 | 2   | 8   | 138    | 31     | 16.28 | 84        | 106        | 68         | 109 | 111 | 114 | 118  | 85   | 118 | 116 | 120 | 112  | 76   | 119 | 126 | 132 | 97   | 58   | 132  | 1          | 0        | 1              | 0            | 0              | 48                    | 8.40        | 1           |      |
| 1050 | 2   | 9   | 140    | 35     | 17.86 | 84        | 101        | 45         | 93  | 98  | 100 | 106  | 65   | 96  | 104 | 93  | 110  | 73   | 98  | 94  | 96  | 98   | 46   | 100  | 104        | 1        | 0              | 0            | 0              | 1                     | 20          | 8.40        | 0    |
| 1051 | 1   | 8   | 134    | 29     | 16.15 | 96        | 139        | 68         | 108 | 105 | 105 | 131  | 73   | 105 | 106 | 105 | 122  | 74   | 105 | 102 | 103 | 129  | 68   | 113  | 113        | 0        | 0              | 0            | 0              | 1                     | 17          | 9.60        | 0    |
| 1052 | 1   | 9   | 135    | 40     | 21.95 | 82        | 115        | 58         | 102 | 105 | 105 | 118  | 83   | 107 | 96  | 97  | 117  | 79   | 107 | 105 | 104 | 89   | 66   | 104  | 107        | 1        | 0              | 0            | 0              | 0                     | 25          | 8.20        | 0    |
| 1053 | 1   | 11  | 135    | 28     | 15.36 | 103       | 112        | 54         | 122 | 115 | 112 | 113  | 69   | 117 | 121 | 116 | 109  | 67   | 130 | 122 | 125 | 111  | 70   | 122  | 130        | 0        | 0              | 0            | 0              | 1                     | 27          | 10.30       | 0    |
| 1054 | 1   | 9   | 138    | 35     | 18.38 | 100       | 131        | 75         | 111 | 107 | 102 | 146  | 58   | 117 | 105 | 108 | 144  | 86   | 109 | 113 | 119 | 140  | 75   | 115  | 119        | 0        | 0              | 1            | 0              | 1                     | 19          | 10.00       | 0    |
| 1058 | 1   | 10  | 137    | 32     | 17.05 | 84        | 110        | 63         | 110 | 105 | 114 | 127  | 90   | 109 | 112 | 118 | 120  | 83   | 115 | 114 | 113 | 119  | 82   | 118  | 118        | 1        | 0              | 0            | 0              | 1                     | 34          | 8.40        | 0    |
| 1060 | 2   | 11  | 133    | 25     | 14.13 | 67        | 103        | 66         | 82  | 84  | 80  | 114  | 78   | 98  | 81  | 97  | 113  | 75   | 105 | 89  | 98  | 107  | 74   | 93   | 105        | 0        | 0              | 0            | 0              | 0                     | 38          | 6.70        | 0    |
| 1061 | 1   | 9   | 136    | 27     | 14.60 | 113       | 110        | 61         | 126 | 124 | 125 | 114  | 58   | 128 | 127 | 130 | 118  | 63   | 126 | 132 | 125 | 119  | 76   | 126  | 132        | 0        | 0              | 0            | 0              | 1                     | 19          | 11.30       | 0    |
| 1062 | 1   | 9   | 141    | 28     | 14.08 | 81        | 95         | 69         | 105 | 104 | 109 | 99   | 74   | 104 | 108 | 106 | 103  | 74   | 102 | 106 | 110 | 110  | 79   | 107  | 110        | 0        | 0              | 0            | 0              | 0                     | 29          | 8.10        | 0    |
| 1064 | 1   | 8   | 127    | 28     | 17.36 | 83        | 112        | 60         | 100 | 100 | 104 | 125  | 77   | 104 | 101 | 98  | 121  | 72   | 104 | 102 | 94  | 116  | 73   | 97   | 104        | 1        | 0              | 0            | 0              | 1                     | 21          | 8.30        | 0    |
| 1065 | 2   | 10  | 141    | 41     | 20.62 | 80        | 104        | 61         | 85  | 81  | 93  | 110  | 75   | 90  | 89  | 88  | 108  | 70   | 91  | 91  | 93  | 108  | 74   | 90   | 93         | 1        | 0              | 0            | 0              | 1                     | 13          | 8.00        | 0    |
| 1066 | 1   | 9   | 125    | 25     | 16.00 | 88        | 108        | 64         | 100 | 108 | 106 | 115  | 80   | 108 | 110 | 109 | 117  | 84   | 113 | 113 | 116 | 118  | 87   | 114  | 116        | 1        | 0              | 1            | 0              | 0                     | 28          | 8.80        | 0    |
| 1067 | 2   | 10  | 143    | 32     | 15.65 | 87        | 130        | 52         | 97  | 105 | 101 | 121  | 64   | 104 | 106 | 103 | 130  | 73   | 105 | 110 | 104 | 120  | 77   | 110  | 110        | 1        | 0              | 0            | 0              | 0                     | 23          | 8.70        | 0    |
| 1068 | 2   | 9   | 133    | 28     | 15.83 | 88        | 102        | 53         | 110 | 108 | 107 | 102  | 71   | 112 | 117 | 114 | 108  | 81   | 112 | 114 | 113 | 112  | 72   | 110  | 117        | 1        | 0              | 0            | 0              | 1                     | 29          | 8.80        | 0    |
| 1069 | 1   | 9   | 131    | 27     | 15.73 | 108       | 117        | 82         | 121 | 123 | 124 | 121  | 89   | 127 | 129 | 129 | 121  | 90   | 131 | 126 | 127 | 119  | 86   | 121  | 131        | 0        | 0              | 0            | 0              | 0                     | 23          | 10.80       | 0    |
| 1070 | 1   | 10  | 138    | 35     | 18.38 | 82        | 100        | 61         | 96  | 95  | 98  | 104  | 78   | 89  | 96  | 93  | 111  | 77   | 96  | 101 | 99  | 112  | 79   | 92   | 101        | 1        | 1              | 1            | 1              | 1                     | 19          | 8.20        | 0    |
| 1072 | 1   | 9   | 133    | 30     | 16.96 | 87        | 121        | 64         | 107 | 104 | 107 | 121  | 77   | 107 | 112 | 117 | 125  | 76   | 105 | 112 | 117 | 125  | 76   | 110  | 117        | 0        | 0              | 0            | 0              | 1                     | 30          | 8.70        | 0    |
| 1074 | 1   | 8   | 127    | 26     | 16.12 | 102       | 106        | 60         | 108 | 109 | 115 | 112  | 70   | 120 | 122 | 123 | 116  | 69   | 120 | 127 | 115 | 119  | 75   | 120  | 127        | 0        | 0              | 1            | 1              | 0                     | 25          | 10.20       | 1    |
| 1076 | 1   | 9   | 139    | 30     | 15.53 | 88        | 100        | 64         | 114 | 108 | 105 | 106  | 65   | 107 | 108 | 107 | 105  | 71   | 106 | 107 | 108 | 116  | 71   | 109  | 114        | 0        | 0              | 0            | 0              | 0                     | 26          | 8.80        | 0    |
| 1079 | 1   | 10  | 128    | 28     | 17.09 | 80        | 106        | 60         | 101 | 98  | 103 | 111  | 78   | 102 | 104 | 97  | 111  | 73   | 103 | 104 | 104 | 116  | 67   | 105  | 105        | 1        | 0              | 1            | 0              | 0                     | 25          | 8.00        | 0    |
| 1080 | 1   | 8   | 125    | 25     | 16.00 | 97        | 96         | 44         | 112 | 108 | 114 | 105  | 67   | 106 | 106 | 105 | 108  | 67   | 107 | 105 | 107 | 108  | 69   | 108  | 114        | 0        | 0              | 0            | 0              | 0                     | 17          | 9.70        | 0    |
| 1081 | 2   | 9   | 136    | 30     | 16.22 | 81        | 108        | 71         | 97  | 104 | 110 | 112  | 67   | 116 | 114 | 110 | 108  | 72   | 116 | 112 | 118 | 113  | 68   | 114  | 118        | 0        | 0              | 0            | 0              | 1                     | 37          | 8.10        | 0    |
| 1082 | 2   | 10  | 140    | 34     | 17.35 | 85        | 116        | 74         | 96  | 104 | 107 | 126  | 87   | 106 | 104 | 105 | 110  | 80   | 107 | 107 | 115 | 129  | 82   | 111  | 115        | 1        | 0              | 0            | 0              | 0                     | 30          | 8.50        | 0    |
| 1083 | 2   | 9   | 143    | 38     | 18.58 | 98        | 103        | 64         | 108 | 106 | 104 | 118  | 83   | 103 | 107 | 109 | 113  | 82   | 108 | 105 | 109 | 115  | 77   | 112  | 112        | 1        | 0              | 0            | 0              | 1                     | 14          | 9.80        | 0    |
| 1084 | 2   | 9   | 139    | 32     | 16.56 | 93        | 114        | 67         | 111 | 97  | 94  | 117  | 76   | 100 | 107 | 103 | 121  | 80   | 103 | 106 | 99  | 118  | 81   | 105  | 111        | 0        | 0              | 0            | 0              | 0                     | 18          | 9.30        | 0    |
| 1085 | 1   | 9   | 140    | 42     | 21.43 | 100       | 114        | 70         | 114 | 114 | 109 | 125  | 79   | 105 | 111 | 114 | 126  | 81   | 106 | 112 | 111 | 128  | 77   | 106  | 114        | 0        | 0              | 0            | 0              | 0                     | 14          | 10.00       | 0    |
| 1086 | 2   | 9   | 141    | 46     | 23.14 | 99        | 125        | 71         | 113 | 112 | 107 | 139  | 67   | 107 | 116 | 114 | 140  | 78   | 108 | 111 | 115 | 136  | 68   | 112  | 115        | 1        | 0              | 0            | 0              | 0                     | 16          | 9.90        | 0    |
| 108  |     |     |        |        |       |           |            |            |     |     |     |      |      |     |     |     |      |      |     |     |     |      |      |      |            |          |                |              |                |                       |             |             |      |

# Test group

| code | sex | age | height | weight | BMI   | supine HR | supine SBP | supine DBP | HR1 | HR2 | HR3 | SBP3 | DBP3 | HR4 | HR5 | HR6 | SBP6 | DBP6 | HR7 | HR8 | HR9 | SBP9 | DBP9 | HR10 | highest HR | car sick | family history | water intake | sleeping hours | school-induced burden | HR increase | supine HR10 | POTS |
|------|-----|-----|--------|--------|-------|-----------|------------|------------|-----|-----|-----|------|------|-----|-----|-----|------|------|-----|-----|-----|------|------|------|------------|----------|----------------|--------------|----------------|-----------------------|-------------|-------------|------|
| 1154 | 1   | 9   | 147    | 30     | 13.88 | 101       | 118        | 74         | 118 | 117 | 119 | 123  | 89   | 116 | 120 | 121 | 123  | 89   | 124 | 123 | 125 | 125  | 91   | 128  | 128        | 0        | 0              | 0            | 0              | 1                     | 27          | 10.10       | 0    |
| 1155 | 2   | 9   | 120    | 34     | 23.61 | 84        | 114        | 54         | 89  | 97  | 84  | 113  | 78   | 88  | 90  | 90  | 115  | 70   | 93  | 94  | 94  | 113  | 72   | 89   | 97         | 1        | 0              | 0            | 0              | 1                     | 13          | 8.40        | 0    |
| 1156 | 1   | 9   | 150    | 42     | 18.67 | 90        | 113        | 4          | 101 | 110 | 102 | 129  | 75   | 103 | 107 | 105 | 130  | 75   | 108 | 109 | 108 | 128  | 73   | 105  | 110        | 0        | 0              | 1            | 0              | 1                     | 20          | 9.00        | 0    |
| 1159 | 2   | 9   | 140    | 35     | 17.86 | 86        | 118        | 57         | 104 | 103 | 93  | 128  | 78   | 94  | 103 | 93  | 121  | 80   | 102 | 92  | 96  | 127  | 82   | 102  | 104        | 0        | 0              | 0            | 0              | 0                     | 18          | 8.60        | 0    |
| 1160 | 1   | 10  | 146    | 35     | 16.42 | 78        | 106        | 70         | 106 | 102 | 103 | 112  | 78   | 106 | 107 | 102 | 115  | 77   | 109 | 102 | 108 | 110  | 70   | 102  | 109        | 0        | 0              | 0            | 0              | 1                     | 31          | 7.80        | 0    |
| 1161 | 2   | 9   | 135    | 30     | 16.46 | 70        | 110        | 60         | 89  | 92  | 90  | 105  | 71   | 94  | 88  | 93  | 105  | 73   | 97  | 94  | 90  | 102  | 72   | 95   | 97         | 1        | 0              | 1            | 0              | 0                     | 27          | 7.00        | 0    |
| 1162 | 2   | 9   | 135    | 25     | 13.72 | 96        | 105        | 72         | 112 | 117 | 109 | 116  | 76   | 105 | 108 | 105 | 109  | 73   | 116 | 106 | 113 | 109  | 76   | 109  | 117        | 1        | 0              | 1            | 0              | 0                     | 21          | 9.60        | 0    |
| 1165 | 2   | 8   | 126    | 22     | 13.86 | 84        | 103        | 57         | 99  | 98  | 97  | 112  | 77   | 99  | 100 | 97  | 107  | 77   | 98  | 102 | 97  | 109  | 70   | 102  | 102        | 0        | 0              | 0            | 0              | 1                     | 18          | 8.40        | 0    |
| 1166 | 1   | 7   | 130    | 32     | 18.93 | 108       | 127        | 52         | 114 | 111 | 107 | 137  | 53   | 117 | 114 | 115 | 135  | 0    | 119 | 117 | 122 | 142  | 1    | 119  | 122        | 0        | 0              | 1            | 0              | 1                     | 14          | 10.80       | 0    |
| 1167 | 2   | 7   | 124    | 26     | 16.91 | 73        | 88         | 61         | 98  | 80  | 81  | 100  | 71   | 86  | 85  | 83  | 104  | 70   | 82  | 84  | 87  | 108  | 8    | 83   | 98         | 0        | 0              | 0            | 0              | 1                     | 25          | 7.30        | 0    |
| 1171 | 1   | 8   | 129    | 27     | 16.22 | 98        | 102        | 69         | 116 | 115 | 115 | 110  | 71   | 117 | 110 | 110 | 113  | 75   | 113 | 11  | 118 | 108  | 73   | 116  | 118        | 1        | 0              | 0            | 0              | 0                     | 20          | 9.80        | 0    |
| 1174 | 1   | 7   | 118    | 22     | 15.80 | 99        | 95         | 58         | 107 | 108 | 109 | 105  | 69   | 107 | 114 | 111 | 10   | 69   | 108 | 109 | 108 | 103  | 68   | 106  | 111        | 0        | 0              | 0            | 1              | 0                     | 12          | 9.90        | 0    |
| 1184 | 1   | 9   | 134    | 32     | 17.82 | 80        | 112        | 67         | 87  | 92  | 92  | 117  | 75   | 91  | 92  | 94  | 114  | 70   | 90  | 94  | 93  | 116  | 75   | 94   | 94         | 1        | 0              | 0            | 0              | 1                     | 14          | 8.00        | 0    |
| 1200 | 1   | 9   | 137    | 32     | 17.05 | 76        | 120        | 67         | 87  | 80  | 84  | 131  | 74   | 85  | 93  | 97  | 123  | 82   | 91  | 98  | 97  | 114  | 69   | 96   | 98         | 0        | 0              | 0            | 0              | 0                     | 22          | 7.60        | 0    |
| 1359 | 2   | 9   | 132    | 29     | 16.64 | 87        | 120        | 63         | 94  | 103 | 102 | 125  | 85   | 110 | 100 | 104 | 120  | 78   | 110 | 104 | 97  | 116  | 77   | 101  | 110        | 1        | 1              | 0            | 0              | 1                     | 23          | 8.70        | 0    |
| 1360 | 2   | 8   | 135    | 31     | 17.01 | 96        | 116        | 74         | 109 | 106 | 102 | 115  | 80   | 103 | 109 | 96  | 115  | 76   | 106 | 103 | 105 | 114  | 83   | 101  | 109        | 1        | 0              | 0            | 0              | 1                     | 13          | 9.60        | 0    |
| 1361 | 2   | 8   | 126    | 27     | 17.01 | 78        | 86         | 57         | 105 | 104 | 102 | 101  | 69   | 105 | 101 | 98  | 101  | 76   | 105 | 107 | 112 | 99   | 66   | 109  | 112        | 0        | 0              | 0            | 0              | 1                     | 34          | 7.80        | 0    |
| 1366 | 2   | 10  | 143    | 29     | 14.18 | 81        | 112        | 73         | 97  | 95  | 100 | 120  | 87   | 96  | 95  | 91  | 118  | 80   | 96  | 97  | 96  | 118  | 83   | 95   | 100        | 1        | 0              | 0            | 0              | 0                     | 19          | 8.10        | 0    |
| 1383 | 1   | 9   | 138    | 38     | 19.95 | 84        | 116        | 64         | 97  | 106 | 108 | 124  | 68   | 102 | 105 | 105 | 120  | 70   | 102 | 104 | 98  | 110  | 63   | 102  | 108        | 0        | 0              | 0            | 1              | 1                     | 24          | 8.40        | 0    |
| 1388 | 2   | 7   | 140    | 34     | 17.35 | 86        | 94         | 54         | 91  | 102 | 105 | 102  | 51   | 104 | 108 | 113 | 109  | 62   | 101 | 109 | 107 | 104  | 63   | 106  | 109        | 1        | 0              | 0            | 0              | 1                     | 23          | 8.60        | 0    |
| 1389 | 2   | 7   | 146    | 45     | 21.11 | 103       | 105        | 74         | 100 | 108 | 105 | 112  | 78   | 114 | 110 | 108 | 124  | 80   | 107 | 110 | 104 | 125  | 87   | 105  | 114        | 0        | 0              | 0            | 0              | 1                     | 11          | 10.30       | 0    |
| 1390 | 2   | 7   | 133    | 31     | 17.53 | 80        | 107        | 62         | 96  | 95  | 92  | 113  | 66   | 99  | 96  | 99  | 109  | 74   | 94  | 95  | 91  | 111  | 73   | 94   | 99         | 0        | 0              | 0            | 0              | 0                     | 19          | 8.00        | 0    |
| 1410 | 1   | 8   | 128    | 24     | 14.65 | 78        | 105        | 55         | 93  | 82  | 87  | 115  | 69   | 93  | 102 | 99  | 113  | 72   | 88  | 100 | 88  | 121  | 76   | 92   | 102        | 0        | 0              | 0            | 0              | 0                     | 24          | 7.80        | 0    |
| 1411 | 2   | 7   | 118    | 21     | 15.08 | 107       | 96         | 61         | 109 | 109 | 110 | 112  | 68   | 116 | 118 | 119 | 115  | 76   | 117 | 119 | 128 | 114  | 67   | 125  | 128        | 0        | 0              | 0            | 1              | 1                     | 21          | 10.70       | 0    |
| 1511 | 2   | 9   | 141    | 29     | 14.59 | 77        | 107        | 57         | 88  | 102 | 93  | 111  | 73   | 105 | 93  | 98  | 112  | 65   | 107 | 101 | 112 | 104  | 61   | 109  | 112        | 0        | 0              | 0            | 0              | 1                     | 35          | 7.70        | 0    |
| 1512 | 1   | 9   | 138    | 40     | 21.00 | 92        | 117        | 58         | 102 | 106 | 111 | 114  | 75   | 111 | 110 | 109 | 117  | 76   | 112 | 112 | 110 | 122  | 67   | 111  | 112        | 0        | 0              | 0            | 0              | 0                     | 20          | 9.20        | 0    |
| 1513 | 2   | 9   | 134    | 31     | 17.26 | 80        | 114        | 63         | 84  | 89  | 94  | 117  | 77   | 96  | 95  | 89  | 115  | 78   | 98  | 92  | 96  | 113  | 80   | 90   | 98         | 0        | 0              | 1            | 1              | 0                     | 18          | 8.00        | 0    |
| 102A | 2   | 12  | 148    | 56     | 25.57 | 88        | 113        | 69         | 104 | 101 | 94  | 118  | 76   | 98  | 98  | 97  | 113  | 80   | 101 | 91  | 97  | 121  | 76   | 94   | 104        | 1        | 0              | 0            | 0              | 1                     | 16          | 8.80        | 0    |
| 102B | 2   | 16  | 159    | 51     | 20.17 | 68        | 99         | 63         | 72  | 85  | 87  | 106  | 68   | 80  | 87  | 88  | 106  | 63   | 88  | 93  | 88  | 111  | 70   | 86   | 93         | 0        | 0              | 1            | 0              | 0                     | 25          | 6.80        | 0    |
| 103A | 1   | 12  | 151    | 42     | 18.42 | 80        | 111        | 70         | 94  | 87  | 90  | 123  | 85   | 90  | 103 | 92  | 126  | 75   | 91  | 95  | 98  | 120  | 76   | 95   | 103        | 0        | 0              | 0            | 0              | 1                     | 23          | 8.00        | 0    |
| 103B | 2   | 17  | 164    | 55     | 20.45 | 72        | 102        | 65         | 72  | 73  | 74  | 103  | 69   | 75  | 76  | 76  | 101  | 65   | 79  | 76  | 80  | 104  | 68   | 76   | 80         | 1        | 0              | 1            | 0              | 0                     | 8           | 7.20        | 0    |
| 105A | 2   | 13  | 158    | 44     | 17.63 | 96        | 114        | 63         | 88  | 88  | 96  | 123  | 65   | 100 | 103 | 96  | 119  | 67   | 94  | 97  | 99  | 120  | 78   | 96   | 103        | 1        | 0              | 1            | 0              | 0                     | 7           | 9.60        | 0    |
| 105B | 2   | 17  | 164    | 56     | 20.82 | 75        | 116        | 58         | 98  | 95  | 94  | 114  | 71   | 94  | 98  | 105 | 122  | 69   | 101 | 92  | 95  | 115  | 69   | 98   | 105        | 1        | 0              | 0            | 0              | 0                     | 30          | 7.50        | 0    |
| 106A | 1   | 12  | 156    | 40     | 16.44 | 85        | 110        | 72         | 100 | 95  | 90  | 119  | 79   | 98  | 90  | 91  | 116  | 78   | 90  | 102 | 89  | 117  | 78   | 91   | 102        | 1        | 1              | 1            | 0              | 1                     | 17          | 8.50        | 0    |
| 106B | 2   | 16  | 166    | 59     | 21.41 | 78        | 103        | 62         | 88  | 93  | 89  | 108  | 70   | 93  | 87  | 93  | 113  | 70   | 94  | 98  | 97  | 112  | 78   | 94   | 97         | 0        | 0              | 1            | 0              | 0                     | 19          | 7.80        | 0    |
| 107A | 2   | 12  | 155    | 43     | 17.90 | 94        | 105        | 68         | 93  | 92  | 97  | 107  | 78   | 94  | 97  | 108 | 107  | 75   | 98  | 110 | 110 | 108  | 73   | 105  | 110        | 0        | 0              | 1            | 0              | 1                     | 16          | 9.40        | 0    |
| 107B | 2   | 18  | 160    | 42     | 16.41 | 88        | 108        | 63         | 101 | 104 | 109 | 110  | 76   | 111 | 106 | 118 | 114  | 82   | 110 | 111 | 107 | 116  | 81   | 111  | 111        | 1        | 0              | 1            | 0              | 0                     | 23          | 8.80        | 0    |
| 109A | 1   | 13  | 101    | 50     | 49.01 | 81        | 111        | 65         | 98  | 103 | 97  | 123  | 87   | 100 | 92  | 97  | 121  | 80   | 99  | 102 | 99  | 121  | 79   | 101  | 103        | 1        | 1              | 1            | 0              | 1                     | 22          | 8.10        | 0    |
| 109B | 2   | 18  | 156    | 50     | 20.55 | 85        | 119        | 75         | 101 | 101 | 97  | 131  | 88   | 101 | 96  | 103 | 130  | 86   | 106 | 105 | 105 | 125  | 84   | 105  | 106        | 0        | 0              | 0            | 0              | 0                     | 21          | 8.50        | 0    |
| 113A | 1   | 12  | 157    | 49     | 19.88 | 87        | 102        | 66         | 96  | 94  | 103 | 113  | 82   | 105 | 104 | 100 | 113  | 77   | 103 | 105 | 104 | 110  | 79   | 103  | 105        | 1        | 0              | 1            | 0              | 1                     | 18          | 8.70        | 0    |
| 113B | 2   | 16  | 162    | 48     | 18.29 | 90        | 113        | 68         | 120 | 117 | 117 | 121  | 81   | 123 | 118 | 114 | 125  | 77   | 118 | 111 | 117 | 118  | 83   | 116  | 123        | 0        | 0              | 1            | 1              | 0                     | 33          | 9.00        | 0    |
| 115A | 2   | 11  | 157    | 42     | 17.04 | 75        | 112        | 58         | 90  | 93  | 88  | 116  | 80   | 100 | 99  | 98  | 112  | 70   | 94  | 101 | 98  | 116  | 74   | 103  | 103        | 1        | 1              | 1            | 0              | 1                     | 28          | 7.50        | 0    |
| 115B | 2   | 18  | 159    | 71     | 28.08 | 82        | 122        | 69         | 113 | 108 | 110 | 123  | 74   | 102 | 106 | 102 | 120  | 59   | 101 | 99  | 102 | 124  | 67   | 99   | 113        | 1        | 0              | 0            | 0              | 0                     | 31          | 8.20        | 0    |
| 118A | 2   | 12  | 145    | 38     | 18.07 | 85        | 100        | 55         | 83  | 85  | 86  | 103  | 64   | 87  | 95  | 95  | 104  | 66   | 94  | 95  | 93  | 105  | 70   | 93   | 95         | 0        | 0              | 0            | 0              | 1                     | 10          | 8.50        | 0    |
| 118B | 2   | 17  | 162    | 52     | 19.81 | 69        | 115        | 68         | 72  | 78  | 81  | 117  | 77   | 80  | 81  | 92  | 113  | 77   | 87  | 78  | 95  | 121  | 83   | 88   | 92         | 1        | 0              | 1            | 1              | 0                     | 23          | 6.90        | 0    |
| 120A | 2   | 12  | 159    | 44     | 17.40 | 78        | 124        | 72         | 90  | 88  | 92  | 135  | 93   | 91  | 101 | 103 | 133  | 91   | 92  | 110 | 106 | 133  | 95   | 100  | 110        | 0        | 1              | 0            | 0              | 0                     | 32          | 7.80        | 0    |
| 120B | 2   | 14  | 153    | 54     | 23.07 | 76        | 110        | 72         | 82  | 84  | 87  | 120  | 84   | 92  | 98  | 91  | 115  | 82   | 94  | 91  | 94  | 114  | 80   | 94   | 98         | 1        | 0              | 0            | 0              | 0                     | 22          | 7.60        | 0    |
| 123A | 2   | 14  | 154    | 56     | 23.61 | 86        | 115        | 67         | 89  | 85  | 84  | 128  | 78   | 90  | 92  |     |      |      |     |     |     |      |      |      |            |          |                |              |                |                       |             |             |      |

# Test group

| code | sex | age | height | weight | BMI   | supine HR | supine SBP | supine DBP | HR1 | HR2 | HR3 | SBP3 | DBP3 | HR4 | HR5 | HR6 | SBP6 | DBP6 | HR7 | HR8 | HR9 | SBP9 | DBP9 | HR10 | highest HR | car sick | family history | water intake | sleeping hours | school-induced burden | HR increase | supine HR10 | POTS |   |
|------|-----|-----|--------|--------|-------|-----------|------------|------------|-----|-----|-----|------|------|-----|-----|-----|------|------|-----|-----|-----|------|------|------|------------|----------|----------------|--------------|----------------|-----------------------|-------------|-------------|------|---|
| 138A | 2   | 12  | 155    | 45     | 18.73 | 86        | 119        | 76         | 115 | 113 | 104 | 124  | 79   | 124 | 124 | 116 | 125  | 87   | 122 | 128 | 130 | 118  | 83   | 124  | 130        | 0        | 0              | 0            | 0              | 1                     | 44          | 8.60        | 1    |   |
| 138B | 2   | 17  | 159    | 69     | 27.29 | 72        | 120        | 74         | 64  | 64  | 66  | 125  | 76   | 79  | 74  | 74  | 122  | 72   | 74  | 73  | 73  | 118  | 72   | 72   | 79         | 1        | 0              | 1            | 0              | 0                     | 7           | 7.20        | 0    |   |
| 140A | 1   | 14  | 172    | 51     | 17.24 | 72        | 107        | 56         | 111 | 102 | 106 | 121  | 74   | 101 | 104 | 104 | 120  | 74   | 103 | 103 | 103 | 117  | 77   | 104  | 111        | 0        | 1              | 1            | 0              | 0                     | 39          | 7.20        | 0    |   |
| 140B | 2   | 17  | 161    | 51     | 19.68 | 74        | 113        | 71         | 86  | 87  | 89  | 121  | 82   | 87  | 87  | 86  | 123  | 84   | 86  | 83  | 79  | 122  | 80   | 83   | 89         | 1        | 0              | 1            | 1              | 0                     | 15          | 7.40        | 0    |   |
| 150A | 1   | 14  | 169    | 54     | 18.91 | 98        | 123        | 63         | 108 | 106 | 106 | 128  | 78   | 108 | 104 | 103 | 129  | 72   | 109 | 112 | 107 | 125  | 70   | 105  | 112        | 0        | 1              | 1            | 0              | 1                     | 14          | 9.80        | 0    |   |
| 150B | 2   | 17  | 159    | 61     | 24.13 | 60        | 100        | 63         | 64  | 65  | 71  | 107  | 67   | 70  | 70  | 69  | 101  | 66   | 71  | 69  | 68  | 103  | 64   | 72   | 70         | 1        | 0              | 1            | 0              | 0                     | 10          | 6.00        | 0    |   |
| 152A | 2   | 13  | 153    | 55     | 23.50 | 97        | 107        | 67         | 67  | 123 | 113 | 118  | 116  | 80  | 117 | 120 | 124  | 118  | 81  | 116 | 123 | 118  | 119  | 76   | 120        | 124      | 1              | 0            | 1              | 0                     | 0           | 27          | 9.70 | 0 |
| 152B | 2   | 16  | 158    | 53     | 21.23 | 67        | 106        | 71         | 59  | 73  | 78  | 108  | 69   | 78  | 84  | 77  | 108  | 70   | 81  | 91  | 80  | 104  | 68   | 81   | 91         | 1        | 0              | 1            | 0              | 0                     | 24          | 6.70        | 0    |   |
| 155A | 1   | 11  | 142    | 32     | 15.87 | 84        | 108        | 57         | 93  | 84  | 93  | 115  | 71   | 87  | 93  | 85  | 115  | 68   | 93  | 84  | 91  | 114  | 66   | 84   | 93         | 1        | 0              | 1            | 1              | 1                     | 9           | 8.40        | 0    |   |
| 155B | 2   | 15  | 161    | 54     | 20.83 | 75        | 113        | 62         | 90  | 98  | 101 | 112  | 72   | 100 | 97  | 102 | 119  | 66   | 102 | 104 | 102 | 121  | 72   | 100  | 104        | 1        | 0              | 0            | 0              | 0                     | 29          | 7.50        | 0    |   |
| 156A | 1   | 14  | 156    | 65     | 26.71 | 92        | 117        | 68         | 92  | 95  | 97  | 122  | 77   | 101 | 101 | 94  | 121  | 76   | 100 | 101 | 102 | 126  | 68   | 101  | 102        | 1        | 0              | 0            | 0              | 1                     | 10          | 9.20        | 0    |   |
| 156B | 2   | 17  | 158    | 55     | 22.03 | 78        | 122        | 62         | 82  | 90  | 91  | 122  | 73   | 94  | 90  | 92  | 124  | 68   | 93  | 93  | 92  | 121  | 72   | 93   | 94         | 1        | 0              | 0            | 0              | 0                     | 16          | 7.80        | 0    |   |
| 157A | 1   | 13  | 160    | 46     | 17.97 | 85        | 111        | 65         | 88  | 98  | 92  | 124  | 83   | 101 | 96  | 102 | 119  | 77   | 92  | 100 | 102 | 123  | 77   | 104  | 104        | 1        | 0              | 0            | 0              | 0                     | 19          | 8.50        | 0    |   |
| 157B | 2   | 14  | 162    | 60     | 22.86 | 79        | 113        | 61         | 106 | 79  | 90  | 122  | 70   | 85  | 82  | 80  | 118  | 68   | 86  | 99  | 87  | 121  | 60   | 90   | 106        | 1        | 0              | 0            | 0              | 1                     | 27          | 7.90        | 0    |   |
| 158A | 2   | 13  | 143    | 36     | 17.60 | 81        | 101        | 65         | 81  | 88  | 88  | 114  | 79   | 94  | 94  | 90  | 110  | 75   | 95  | 87  | 87  | 112  | 74   | 92   | 95         | 1        | 1              | 0            | 1              | 1                     | 14          | 8.10        | 0    |   |
| 158B | 2   | 18  | 165    | 60     | 22.04 | 74        | 122        | 57         | 74  | 74  | 76  | 117  | 61   | 74  | 78  | 74  | 120  | 52   | 78  | 75  | 75  | 113  | 64   | 75   | 78         | 1        | 0              | 0            | 0              | 1                     | 4           | 7.40        | 0    |   |
| 159A | 2   | 13  | 159    | 44     | 17.40 | 82        | 114        | 65         | 95  | 98  | 97  | 126  | 78   | 95  | 97  | 102 | 117  | 81   | 96  | 100 | 97  | 127  | 74   | 96   | 102        | 0        | 0              | 0            | 0              | 0                     | 20          | 8.20        | 0    |   |
| 159B | 2   | 18  | 158    | 53     | 21.23 | 67        | 107        | 67         | 78  | 85  | 83  | 111  | 74   | 90  | 86  | 87  | 109  | 72   | 89  | 87  | 91  | 110  | 73   | 89   | 91         | 0        | 0              | 0            | 1              | 0                     | 24          | 6.70        | 0    |   |
| 160A | 1   | 12  | 155    | 43     | 17.90 | 85        | 114        | 72         | 97  | 101 | 104 | 128  | 77   | 110 | 104 | 107 | 124  | 81   | 108 | 108 | 110 | 131  | 86   | 112  | 112        | 0        | 0              | 1            | 0              | 1                     | 27          | 8.50        | 0    |   |
| 160B | 2   | 16  | 160    | 64     | 25.00 | 80        | 118        | 56         | 81  | 80  | 85  | 119  | 71   | 96  | 90  | 88  | 122  | 76   | 87  | 82  | 86  | 122  | 69   | 88   | 96         | 1        | 0              | 0            | 0              | 0                     | 16          | 8.00        | 0    |   |
| 161A | 2   | 12  | 156    | 36     | 14.79 | 76        | 100        | 52         | 110 | 98  | 110 | 106  | 74   | 103 | 101 | 109 | 107  | 75   | 103 | 99  | 104 | 104  | 72   | 101  | 110        | 0        | 0              | 0            | 0              | 0                     | 34          | 7.60        | 0    |   |
| 161B | 2   | 18  | 162    | 60     | 22.86 | 85        | 126        | 82         | 82  | 80  | 90  | 124  | 81   | 94  | 96  | 95  | 129  | 81   | 98  | 97  | 101 | 131  | 91   | 95   | 101        | 0        | 1              | 0            | 0              | 0                     | 16          | 8.50        | 0    |   |
| 162A | 2   | 12  | 155    | 45     | 18.73 | 74        | 112        | 67         | 90  | 91  | 87  | 120  | 79   | 90  | 94  | 93  | 112  | 77   | 96  | 92  | 92  | 118  | 75   | 94   | 96         | 1        | 0              | 1            | 0              | 0                     | 22          | 7.40        | 0    |   |
| 162B | 2   | 17  | 158    | 64     | 25.64 | 60        | 121        | 75         | 67  | 70  | 71  | 123  | 77   | 74  | 76  | 75  | 118  | 75   | 80  | 72  | 80  | 121  | 73   | 76   | 80         | 0        | 0              | 1            | 0              | 0                     | 20          | 6.00        | 0    |   |
| 163A | 1   | 13  | 158    | 38     | 15.22 | 105       | 125        | 74         | 113 | 109 | 106 | 141  | 90   | 113 | 119 | 115 | 131  | 78   | 115 | 121 |     | 132  | 88   |      | 119        | 0        | 1              | 0            | 0              | 1                     | 14          | 10.50       | 0    |   |
| 163B | 2   | 16  | 163    | 45     | 16.94 | 75        | 109        | 75         | 78  | 73  | 81  | 117  | 81   | 73  | 75  | 78  | 110  | 72   | 75  | 76  | 77  | 114  | 83   | 76   | 81         | 1        | 0              | 1            | 1              | 1                     | 6           | 7.50        | 0    |   |
| 167A | 2   | 13  | 161    | 43     | 16.59 | 90        | 97         | 59         | 111 | 112 | 112 | 109  | 75   | 122 | 115 | 113 | 111  | 74   | 125 | 120 | 115 | 127  | 57   | 113  | 125        | 0        | 1              | 0            | 1              | 1                     | 35          | 9.00        | 1    |   |
| 167B | 2   | 16  | 158    | 40     | 16.02 | 61        | 100        | 64         | 71  | 71  | 73  | 108  | 72   | 70  | 69  | 72  | 108  | 68   | 72  | 75  | 78  | 108  | 67   | 76   | 78         | 0        | 0              | 1            | 1              | 0                     | 17          | 6.10        | 0    |   |
| 174A | 2   | 15  | 163    | 48     | 18.07 | 60        | 117        | 71         | 102 | 100 | 105 | 127  | 85   | 103 | 110 | 112 | 124  | 82   | 110 | 106 | 110 | 116  | 83   | 110  | 112        | 0        | 0              | 1            | 1              | 1                     | 52          | 6.00        | 1    |   |
| 174B | 2   | 17  | 159    | 50     | 19.78 | 78        | 104        | 71         | 94  | 89  | 87  | 114  | 81   | 91  | 88  | 86  | 113  | 80   | 92  | 88  | 92  | 107  | 75   | 94   | 94         | 1        | 0              | 1            | 0              | 0                     | 16          | 7.80        | 0    |   |
| 180A | 2   | 13  | 146    | 55     | 25.80 | 82        | 120        | 72         | 78  | 79  | 79  | 127  | 90   | 80  | 89  | 84  | 137  | 83   | 78  | 84  | 86  | 123  | 87   | 79   | 89         | 1        | 1              | 0            | 0              | 1                     | 7           | 8.20        | 0    |   |
| 180B | 1   | 15  | 177    | 70     | 22.34 | 85        | 122        | 79         | 117 | 113 | 113 | 125  | 85   | 122 | 118 | 109 | 138  | 81   | 116 | 117 | 115 | 125  | 88   | 122  | 122        | 0        | 1              | 0            | 0              | 0                     | 37          | 8.50        | 0    |   |
| 181A | 2   | 13  | 151    | 45     | 19.74 | 77        | 109        | 72         | 90  | 89  | 84  | 118  | 89   | 90  | 93  | 95  | 118  | 77   | 85  | 92  | 96  | 113  | 82   | 95   | 96         | 1        | 1              | 1            | 0              | 1                     | 19          | 7.70        | 0    |   |
| 181B | 1   | 17  | 178    | 61     | 19.25 | 93        | 104        | 63         | 116 | 117 | 120 | 112  | 69   | 119 | 121 | 124 | 114  | 74   | 112 | 118 | 122 | 115  | 69   |      | 124        | 1        | 0              | 0            | 0              | 0                     | 31          | 9.30        | 0    |   |
| 182A | 1   | 14  | 160    | 49     | 18.95 | 77        | 114        | 51         | 88  | 90  | 89  | 115  | 55   | 100 | 93  | 89  | 115  | 49   | 93  | 88  | 100 | 113  | 49   | 100  | 100        | 1        | 0              | 0            | 0              | 1                     | 23          | 7.70        | 0    |   |
| 182B | 1   | 17  | 167    | 67     | 24.02 | 93        | 118        | 65         | 100 | 101 | 100 | 122  | 77   | 102 | 104 | 104 | 125  | 75   | 102 | 103 | 104 | 126  | 77   | 103  | 104        | 0        | 0              | 1            | 1              | 0                     | 11          | 9.30        | 0    |   |
| 183A | 2   | 13  | 157    | 51     | 20.69 | 98        | 124        | 81         | 104 | 99  | 96  | 122  | 90   | 102 | 108 | 101 | 123  | 85   | 102 | 104 | 106 | 127  | 84   | 105  | 106        | 0        | 0              | 1            | 0              | 1                     | 8           | 9.80        | 0    |   |
| 183B | 1   | 13  | 158    | 41     | 16.42 | 78        | 107        | 64         |     |     |     | 118  | 77   |     |     |     |      |      |     |     |     |      |      |      | 77         | 0        | 0              | 0            | 0              | 1                     | -1          | 7.80        | 0    |   |
| 187A | 1   | 12  | 151    | 41     | 17.98 | 77        | 105        | 54         | 82  | 86  | 92  | 116  | 72   | 92  | 91  | 93  | 110  | 60   | 94  | 99  | 100 | 105  | 67   | 96   | 100        | 1        | 1              | 1            | 1              | 1                     | 23          | 7.70        | 0    |   |
| 187B | 1   | 14  | 164    | 54     | 20.08 | 69        | 104        | 55         | 85  | 95  | 84  | 116  | 62   | 93  | 84  | 94  | 112  | 67   | 88  | 85  | 92  | 99   | 78   | 89   | 95         | 0        | 1              | 1            | 1              | 0                     | 26          | 6.90        | 0    |   |
| 194A | 2   | 13  | 165    | 50     | 18.37 | 82        | 117        | 66         | 88  | 105 | 98  | 125  | 72   | 107 | 105 | 100 | 130  | 79   | 107 | 111 | 108 | 124  | 75   | 112  | 112        | 1        | 1              | 0            | 0              | 1                     | 30          | 8.20        | 0    |   |
| 194B | 1   | 18  | 171    | 54     | 18.47 | 68        | 112        | 73         | 86  | 95  | 88  | 134  | 89   | 88  | 86  | 74  | 124  | 95   | 88  | 81  | 89  | 127  | 89   | 80   | 95         | 0        | 0              | 0            | 0              | 0                     | 27          | 6.80        | 0    |   |
| 253A | 2   | 14  | 163    | 56     | 21.08 | 75        | 109        | 69         | 98  | 89  | 76  | 143  | 93   | 74  | 86  | 90  | 123  | 87   | 91  | 90  | 91  | 127  | 84   | 92   | 98         | 1        | 1              | 1            | 1              | 1                     | 23          | 7.50        | 0    |   |
| 253B | 1   | 18  | 177    | 49     | 15.64 | 81        | 115        | 71         | 105 | 85  | 89  | 119  | 70   | 87  | 85  | 88  | 113  | 66   | 88  | 83  | 93  | 108  | 72   | 90   | 105        | 0        | 0              | 1            | 0              | 0                     | 24          | 8.10        | 0    |   |
| 70A  | 1   | 12  | 149    | 37     | 16.67 | 91        | 106        | 64         | 105 | 106 | 108 | 116  | 82   | 109 | 110 | 112 | 114  | 73   | 109 | 116 | 117 | 115  | 77   | 118  | 118        | 1        | 0              | 0            | 0              | 0                     | 27          | 9.10        | 0    |   |
| 70B  | 2   | 14  | 163    | 52     | 19.57 | 66        | 109        | 70         | 79  | 90  | 80  | 122  | 91   | 86  | 77  | 70  | 114  | 77   | 75  | 81  | 74  | 118  | 74   | 83   | 90         | 1        | 0              | 1            | 0              | 1                     | 24          | 6.60        | 0    |   |
| 71A  | 1   | 12  | 167    | 45     | 16.14 | 103       | 107        | 70         | 92  | 86  | 92  | 130  | 85   | 90  | 92  | 92  | 121  | 84   | 88  | 90  | 95  | 124  | 84   | 86   | 95         | 0        | 0              | 1            | 0              | 1                     | -8          | 10.30       | 0    |   |
| 71B  | 2   | 16  | 160    | 48     | 18.75 | 85        | 106        | 64         | 122 | 112 | 112 | 118  | 68   | 121 | 124 | 120 | 112  | 71   | 114 | 121 | 113 | 114  | 67   | 112  | 124        | 1        | 0              |              |                |                       |             |             |      |   |
