# Supplementary material for: Risk Factors for Postural Tachycardia Syndrome in Children and Adolescents
Source: PubMed Central journal article supplement (PMC4256207; doi:10.1371/journal.pone.0113625), 2014-12-04
Supplement: pone.0113625.s002.pdf [file pone.0113625.s002.pdf]

# Validation group

| code | sex | age | height | weight | BMI   | supine HR | supine SBP | supine DBP | HR1 | HR2 | HR3 | SBP3 | DBP3 | HR4 | HR5 | HR6 | SBP6 | DBP6 | HR7 | HR8 | HR9 | SBP9 | DBP9 | HR10 | Highest HR | car sick | family history | water intake | sleeping hours | school-induced burden | HR increase | supine HR10 | POTS |
|------|-----|-----|--------|--------|-------|-----------|------------|------------|-----|-----|-----|------|------|-----|-----|-----|------|------|-----|-----|-----|------|------|------|------------|----------|----------------|--------------|----------------|-----------------------|-------------|-------------|------|
| 916  | 2   | 9   | 139    | 49     | 25.36 | 82        | 104        | 58         | 104 | 107 | 106 | 103  | 71   | 104 | 107 | 101 | 97   | 60   | 102 | 105 | 107 | 100  | 66   | 107  | 107        | 1        | 1              | 1            | 0              | 1                     | 25          | 8.20        | 0    |
| 920  | 1   | 9   | 137    | 30     | 15.98 | 80        | 103        | 45         | 106 | 109 | 104 | 108  | 72   | 103 | 94  | 94  | 110  | 72   | 93  | 108 | 107 | 108  | 73   | 103  | 109        | 0        | 0              | 0            | 0              | 0                     | 29          | 8.00        | 0    |
| 929  | 1   | 7   | 132    | 25     | 14.35 | 98        | 109        | 71         | 119 | 124 | 119 | 117  | 83   | 121 | 123 | 119 | 118  | 86   | 125 | 118 | 125 | 114  | 81   | 123  | 125        | 1        | 0              | 0            | 0              | 0                     | 27          | 9.80        | 0    |
| 940  | 2   | 7   | 128    | 23     | 14.04 | 94        | 117        | 73         | 107 | 102 | 113 | 126  | 82   | 103 | 106 | 96  | 117  | 79   | 98  | 108 | 105 | 119  | 74   | 110  | 113        | 1        | 0              | 0            | 0              | 0                     | 19          | 9.40        | 0    |
| 944  | 1   | 11  | 142    | 34     | 16.86 | 108       | 119        | 77         | 113 | 116 | 113 | 131  | 94   | 118 | 120 | 117 | 132  | 91   | 112 | 114 | 117 | 125  | 89   | 117  | 120        | 1        | 0              | 0            | 0              | 1                     | 12          | 10.80       | 1    |
| 946  | 1   | 10  | 141    | 36     | 18.11 | 89        | 116        | 78         | 106 | 106 | 109 | 132  | 91   | 107 | 117 | 116 | 129  | 88   | 124 | 108 | 107 | 126  | 91   | 118  | 124        | 1        | 1              | 0            | 0              | 0                     | 35          | 8.90        | 0    |
| 947  | 1   | 10  | 142    | 51     | 25.29 | 78        | 101        | 48         | 94  | 94  | 100 | 117  | 76   | 85  | 93  | 100 | 115  | 68   | 96  | 90  | 100 | 112  | 70   | 100  | 100        | 0        | 0              | 0            | 1              | 0                     | 22          | 7.80        | 0    |
| 948  | 2   | 10  | 142    | 33     | 16.37 | 87        | 133        | 73         | 95  | 95  | 97  | 101  | 53   | 96  | 94  | 96  | 100  | 77   | 99  | 95  | 96  | 102  | 59   | 97   | 99         | 1        | 1              | 0            | 0              | 1                     | 12          | 8.70        | 0    |
| 949  | 2   | 10  | 136    | 36     | 19.46 | 100       | 103        | 63         | 110 | 110 | 107 | 106  | 69   | 108 | 108 | 115 | 109  | 69   | 111 | 114 | 112 | 108  | 70   | 113  | 115        | 1        | 0              | 0            | 0              | 0                     | 15          | 10.00       | 0    |
| 950  | 2   | 10  | 135    | 30     | 16.46 | 97        | 100        | 60         | 108 | 112 | 122 | 111  | 82   | 120 | 125 | 122 | 107  | 53   | 125 | 115 | 123 | 102  | 73   | 125  | 125        | 0        | 0              | 0            | 0              | 0                     | 28          | 9.70        | 0    |
| 951  | 2   | 10  | 140    | 37     | 18.88 | 108       | 115        | 67         | 116 | 117 | 117 | 119  | 66   | 121 | 118 | 117 | 126  | 44   | 111 | 116 | 116 | 105  | 67   | 118  | 121        | 1        | 1              | 0            | 1              | 1                     | 13          | 10.80       | 0    |
| 952  | 2   | 10  | 143    | 30     | 14.67 | 107       | 109        | 76         | 122 | 114 | 117 | 116  | 87   | 113 | 118 | 117 | 116  | 80   | 113 | 118 | 115 | 110  | 78   | 120  | 122        | 1        | 1              | 0            | 1              | 1                     | 15          | 10.70       | 0    |
| 953  | 2   | 10  | 148    | 41     | 18.72 | 91        | 108        | 36         | 105 | 106 | 111 | 115  | 50   | 110 | 111 | 113 | 122  | 49   | 112 | 110 | 113 | 114  | 49   | 109  | 113        | 1        | 0              | 0            | 0              | 1                     | 22          | 9.10        | 0    |
| 963  | 2   | 8   | 138    | 32     | 16.80 | 82        | 94         | 55         | 112 | 115 | 113 | 109  | 70   | 116 | 116 | 122 | 115  | 81   | 126 | 129 | 131 | 123  | 84   | 128  | 131        | 0        | 0              | 1            | 1              | 1                     | 49          | 8.20        | 1    |
| 1013 | 1   | 7   | 140    | 30     | 15.31 | 82        | 106        | 65         | 116 | 118 | 122 | 112  | 75   | 110 | 112 | 112 | 114  | 79   | 118 | 125 | 123 | 112  | 79   | 112  | 125        | 0        | 0              | 1            | 1              | 1                     | 43          | 8.20        | 1    |
| 1028 | 2   | 10  | 148    | 34     | 15.52 | 80        | 104        | 67         | 92  | 105 | 102 | 105  | 72   | 104 | 102 | 99  | 108  | 74   | 99  | 102 | 109 | 115  | 74   | 108  | 109        | 1        | 1              | 0            | 0              | 1                     | 29          | 8.00        | 0    |
| 1092 | 1   | 7   | 126    | 24     | 15.12 | 88        | 102        | 62         | 103 | 105 | 103 | 112  | 72   | 100 | 103 | 107 | 107  | 71   | 102 | 99  | 98  | 108  | 68   | 97   | 107        | 0        | 0              | 0            | 0              | 1                     | 19          | 8.80        | 0    |
| 1093 | 2   | 7   | 125    | 26     | 16.64 | 86        | 96         | 60         | 111 | 114 | 113 | 101  | 65   | 116 | 112 | 113 | 99   | 70   | 118 | 120 | 123 | 109  | 74   | 122  | 123        | 1        | 0              | 1            | 1              | 1                     | 37          | 8.60        | 0    |
| 1094 | 2   | 7   | 125    | 24     | 15.36 | 95        | 105        | 70         | 123 | 127 | 128 | 89   | 66   | 126 | 125 | 129 | 110  | 70   | 130 | 132 | 127 | 125  | 76   | 127  | 132        | 1        | 0              | 0            | 0              | 1                     | 37          | 9.50        | 0    |
| 1255 | 1   | 7   | 126    | 25     | 15.75 | 85        | 115        | 52         | 96  | 102 | 101 | 114  | 65   | 98  | 100 | 105 | 113  | 64   | 103 | 105 | 100 | 117  | 67   | 105  | 105        | 0        | 0              | 0            | 0              | 0                     | 20          | 8.50        | 0    |
| 1363 | 2   | 9   | 133    | 26     | 14.70 | 109       | 102        | 68         | 128 | 131 | 133 | 110  | 81   | 126 | 136 | 135 | 115  | 79   | 129 | 133 | 133 | 111  | 75   | 137  | 137        | 1        | 0              | 1            | 1              | 0                     | 28          | 10.90       | 1    |
| 177A | 2   | 14  | 155    | 46     | 19.15 | 83        | 95         | 56         | 98  | 98  | 98  | 111  | 66   | 102 | 99  | 103 | 107  | 71   | 94  | 88  | 102 | 104  | 71   | 102  | 103        | 1        | 0              | 1            | 0              | 1                     | 20          | 8.30        | 0    |
| 177B | 2   | 16  | 169    | 67     | 23.46 | 64        | 121        | 76         | 77  | 71  | 79  | 127  | 85   | 81  | 90  | 81  | 124  | 82   | 87  | 89  | 85  | 121  | 77   | 81   | 90         | 1        | 0              | 1            | 1              | 0                     | 26          | 6.40        | 0    |
| 192A | 1   | 14  | 172    | 49     | 16.56 | 86        | 104        | 58         | 110 | 104 | 106 | 173  | 150  | 109 | 108 | 109 | 116  | 74   | 105 | 103 | 108 | 116  | 69   | 108  | 110        | 0        | 0              | 1            | 0              | 1                     | 24          | 8.60        | 0    |
| 192B | 1   | 17  | 179    | 62     | 19.35 | 76        | 124        | 69         | 91  | 86  | 83  | 139  | 86   | 83  | 93  | 87  | 132  | 76   | 96  | 88  | 89  | 136  | 67   | 85   | 96         | 0        | 0              | 0            | 0              | 0                     | 20          | 7.60        | 0    |
| 195A | 1   | 14  | 164    | 53     | 19.71 | 86        | 109        | 59         | 105 | 114 | 103 | 123  | 73   | 110 | 109 | 107 | 123  | 72   | 94  | 107 | 105 | 111  | 78   | 106  | 114        | 1        | 0              | 1            | 0              | 0                     | 28          | 8.60        | 0    |
| 195B | 1   | 16  | 166    | 56     | 20.32 | 88        | 125        | 77         | 100 | 92  | 89  | 134  | 86   | 91  | 87  | 86  | 125  | 80   | 98  | 95  | 94  | 128  | 80   | 98   | 100        | 0        | 0              | 1            | 0              | 0                     | 12          | 8.80        | 0    |
| 1A   | 1   | 13  | 148    | 38     | 17.35 | 96        | 115        | 67         | 99  | 107 | 100 | 127  | 78   | 106 | 102 | 102 | 120  | 79   | 104 | 106 | 114 | 125  | 88   | 108  | 114        | 1        | 0              | 1            | 0              | 1                     | 18          | 9.60        | 0    |
| 1B   | 2   | 16  | 169    | 65     | 22.76 | 80        | 105        | 67         | 85  | 80  | 77  | 127  | 81   | 79  | 81  | 82  | 116  | 74   | 85  | 86  | 82  | 109  | 67   | 86   | 86         | 1        | 0              | 0            | 0              | 1                     | 6           | 8.00        | 0    |
| 44A  | 1   | 14  | 166    | 51     | 18.51 | 85        | 109        | 67         | 102 | 102 | 104 | 115  | 81   | 100 | 107 | 101 | 112  | 77   | 98  | 99  | 102 | 115  | 81   | 99   | 107        | 0        | 1              | 1            | 0              | 0                     | 22          | 8.50        | 0    |
| 44B  | 2   | 15  | 157    | 49     | 19.88 | 72        | 110        | 67         | 86  | 86  | 88  | 118  | 71   | 86  | 83  | 85  | 111  | 69   | 85  | 82  | 85  | 106  | 69   | 83   | 88         | 1        | 0              | 1            | 0              | 1                     | 16          | 7.20        | 0    |
| 50A  | 1   | 11  | 158    | 41     | 16.42 | 68        | 111        | 63         | 75  | 78  | 81  | 117  | 75   | 88  | 78  | 80  | 117  | 78   | 83  | 84  | 78  | 116  | 77   | 80   | 88         | 0        | 0              | 1            | 0              | 0                     | 20          | 6.80        | 0    |
| 50B  | 1   | 12  | 143    | 33     | 16.14 | 81        | 95         | 61         | 78  | 80  | 95  | 110  | 76   | 91  | 85  | 87  | 114  | 81   | 88  | 90  | 88  | 115  | 78   | 85   | 95         | 1        | 0              | 1            | 0              | 0                     | 14          | 8.10        | 0    |
